# Supplementary material
Source: Royal Society of Chemistry journal article supplement (doi:10.1039/d6nr01126h)
Supplement: d6nr01126h1.pdf [file d6nr01126h1.pdf]

Supporting information for

# Machine learning accelerated nitrogen electrofixation on dual-atom catalysts

*Changfa Li,<sup>a</sup> Minmin Yan,<sup>a</sup> Pengchen Bao,<sup>a</sup> Jongkook Hwang,<sup>b,c\*</sup> Jingjing Duan,<sup>a</sup> Sheng Chen<sup>a\*</sup>*

<sup>a</sup>Key Laboratory for Soft Chemistry and Functional Materials, School of Chemistry and Chemical Engineering, School of Energy and Power Engineering, Nanjing University of Science and Technology, Ministry of Education, Nanjing, 210094, China

<sup>b</sup>Department of Chemical Engineering, Ajou University, Worldcupro 206, Suwon 16499, Republic of Korea

<sup>c</sup>Department of Energy Systems Research, Ajou University, Worldcupro 206, Suwon 16499, Republic of Korea

Email: [jongkook@ajou.ac.kr](mailto:jongkook@ajou.ac.kr) (J.H.); [sheng.chen@njust.edu.cn](mailto:sheng.chen@njust.edu.cn) (S.C.)

## Computational details

Electrochemical nitrogen reduction reaction (eNRR) catalyzed by transition metal atoms deposited on MoSe<sub>2</sub> sheets has been examined by density functional theory (DFT) through Perdew-Burke-Ernzerh of (PBE)<sup>1</sup> functional within the generalized gradient approximation (GGA) implemented in *MedeA* VASP.<sup>2, 3</sup> The projector-augmented-wave (PAW) pseudopotential was performed to treat the core-electron interactions.<sup>4</sup> A Gaussian smearing method was employed with 0.50 eV width. The K-points for structural optimization in all models were set to 2×2×1. The MoSe<sub>2</sub> (002) surface was cleaved across a direction to form a slab based on P63/mmc space group. Two-layer slab of MoSe<sub>2</sub> was used which was periodic on both the x and y directions consisting of 5×5 unit cells. The associated structural configurations are formed by MoSe<sub>2</sub> connected to two transition metal atoms through optimization with minimum energy. In preliminary works of pursuing efficiency, the cut-off energy for plane wave expansion was fixed at 400 eV, optimized from a range of cut-off energy; the electronic self-consistent-loop criterion was set to 10<sup>-2</sup> eV and the structures were relaxed to forces on all atoms smaller than 0.02 eV/Å. In later verification of pursuing accuracy, the cut-off energy for plane wave expansion was fixed at 500 eV, optimized from a range of cut-off energy; the electronic self-consistent-loop criterion was set to 10<sup>-5</sup> eV and the structures were relaxed to forces on all atoms smaller than 0.01 eV/Å; considering the DFT method has limitations in describing localized *d* electrons, we introduced the method of LSDA + U<sup>5</sup> and considered the effective U parameter (U<sub>eff</sub>) of the Mo atom to be 1.0 eV<sup>6, 7</sup> for simplicity.

The detailed Gibbs free energy calculation without the extra potential was calculated has been carried out based on the computational hydrogen electrode (CHE) model proposed by Nørskov *et al.*<sup>8</sup> as follows:

$$G = E + \int C_p dT - TS + ZPE + D$$

where  $G$ ,  $E$  and  $C_p$  refer to the chemical potential (partial molar Gibbs free energy), electronic energy and heat capacity, and  $T$ ,  $S$ ,  $ZPE$  and  $D$  refer to room temperature (298.15 K), the entropy, intrinsic zero-point energy and extrinsic dispersion, respectively. The entropy term can be expressed as the sum of the translational, rotational, vibrational and electronic contributions as to:

$$S = S_t + S_r + S_v + S_e$$

Since  $S_e \approx 0$  at the fundamental electronic level. For the case of solids and adsorbates, some approximations can be assumed:

1. As for gases, at the fundamental electronic level  $S_e \approx 0$ .
2. Translational and rotational motions can be neglected, therefore,  $S_t \approx 0$  and  $S_r \approx 0$ . In this sense, all entropy contributions come from vibrations:  $S = S_v$ . Similarly, translational and rotational contributions to the heat capacity are neglected.

Therefore, Gibbs free energy for the different states have been calculated as to:

$$G = E + \int C_p dT - TS_v + ZPE + D$$

The NRR is a six-electron reaction including six intermediate steps with electron transfer,  $N_2$  adsorption and  $NH_3$  desorption. For the instance of the distal mechanism, there are changes of intermediates in one nitrogen reduction reaction:

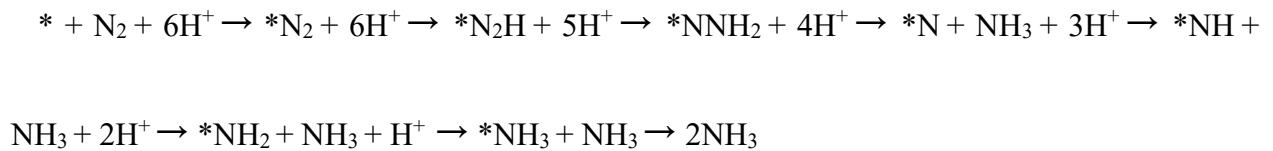

Where  $*$  and  $*X$  refer to the active site of catalysts and the intermediate with the adsorption of  $X$ . Therefore, the adsorption of  $NH_2$ ,  $E_{ads}(NH_2)$ , have been calculated as to:

$$E_{ads}(NH_2) = G(*NH_2) + G(NH_3) + 1/2G(H_2) - [G(*) + G(N_2) + 3G(H_2)]$$

Where Gibbs free energy of micro molecules have been calculated as to:

$$G = E + H - TS + ZPE$$

Where the values of  $E$  is from [www.atomly.net/](http://www.atomly.net/), the values of  $H$ , enthalpy, is from <https://janaf.nist.gov/>, the values of  $TS$  and  $ZPE$ , have referred to the previous study<sup>9</sup>. Therefore, the energy change from  $\text{NH}_2$  to  $\text{NH}_3$  has been calculated as to:

$$\Delta G (\text{NH}_2\text{-NH}_3) = E_{\text{ads}} (\text{NH}_3) - E_{\text{ads}} (\text{NH}_2)$$

The free energy changes of other steps and adsorption energy of other intermediates follow the above-mentioned calculation method.

## Machine-learning details

Machine learning (ML) is a critical branch of artificial intelligence (AI) that enables computers to learn from data automatically through computational methods, improving their decision-making or predictive accuracy over time without relying on pre-established equation models. ML algorithms consist of a series of statistical processing steps trained to identify natural patterns in the input data and make decisions and predictions based on these patterns.

Building a comprehensive ML process typically involves four key steps: first, selecting and preparing a training dataset; second, choosing an appropriate algorithm based on the nature of the problem; third, training the selected algorithm to create a model; and finally, testing and continuously refining the model. Common ML algorithms which were employed in the work mainly include:

1. Bagging regression<sup>10</sup> is a specific application of the bagging ensemble method tailored for regression tasks. It aims to improve the stability and accuracy of regression models by reducing their variance, leading to better performance on unseen data. Advantages of bagging regression mainly include variance reduction, improved robustness and simplicity. Scikit-learn<sup>11</sup> provides a

bagging regressor class that can be used with any base estimator. It simplifies the creation of bagged ensembles by allowing you to specify the number of estimators (`n_estimators`), the maximum fraction of the dataset to draw for each estimator (`max_samples`), and other parameters.

2. Random forest<sup>12</sup> is an ensemble learning technique that constructs multiple decision trees and outputs the mode of their predictions for classification tasks. This method often outperforms support vector machines (SVMs) and has proven successful in many classification challenges. Random Forest offers several advantages: it processes quickly, scales well with large datasets, exhibits robustness against noise, resists overfitting, and provides models that are easy to interpret and visualize. Moreover, it requires minimal parameter tuning, making it user-friendly. Scikit-learn<sup>11</sup> provides a random forest regressor class that can be used with any base estimator. If `bootstrap = true` (which is the default), the size of the sub-samples is controlled by the `max_samples` parameter; otherwise, the entire dataset is used to build each tree.

3. Gradient boosting regression<sup>13</sup> (GBR) is a powerful machine-learning algorithm used for both regression and classification tasks. It belongs to the family of boosting algorithms which combine weak learners into a strong learner in an iterative fashion. In the case of GBR, the weak learners are typically decision trees. Scikit-learn<sup>11</sup> provides a Gradient Boosting Regressor class that can be used with any base estimator. `n_estimators` parameter of GBR refers to the number of learning algorithms used by gradient boosting regression. Since each learning algorithm is a decision tree, the `max_depth` parameter determines the number of nodes in the tree. Selecting an appropriate number of nodes can lead to better data fitting, whereas too many nodes may result in overfitting. The `loss` parameter dictates the loss function and directly impacts the error measurement. The default value `ls` stands for least squares.

## Experimental details

### Materials Synthesis

**Few-layer MoSe<sub>2</sub> was prepared by ultrasonication-assisted liquid-phase exfoliation of bulk MoSe<sub>2</sub>.** Specifically, 75.0 mg bulk MoSe<sub>2</sub> was dispersed in 30 mL of deionized water/isopropanol (DI-water/IPA, 60:40 v/v). The mixture was ultrasonicated at 450 W for 6 h in an ice bath. After standing for 8 h, the top 1/3 supernatant was collected for subsequent use.

**CrNi/MoSe<sub>2</sub> was prepared by a two-step procedure involving chemical deposition with acid washing.** Specifically, 3.0 mg CrCl<sub>3</sub>·6H<sub>2</sub>O and 3.0 mg NiSO<sub>4</sub>·7H<sub>2</sub>O was mixed with 15 mL of few-layer MoSe<sub>2</sub> dispersion. Under rapid stirring and ambient conditions, the mixed solution was added with 25.0 mg of NaBH<sub>4</sub> and then reacted for 1 h. Further, the result was washed with 15 mL of HCl (2.4 mol L<sup>-1</sup>) for 1 h. Followed by DI-water washing and centrifugation, the obtained material is collected and labeled as CrNi/MoSe<sub>2</sub>. Cr/MoSe<sub>2</sub> and Ni/MoSe<sub>2</sub> was also prepared by the synthesis method but only one of metal salts added.

### Physical characterizations

Raman spectra were recorded on a Thermo Scientific DXR Raman microscope with a 532 nm laser. QUANTA 450 scanning electron microscope (SEM) was used to analyze the morphology and size of the samples, and the element content and element mapping map were obtained. XRD was performed on a Smart Lab SE Advanced K $\alpha$ -Diffractometer with Cu K $\alpha$  radiation ( $\lambda = 1.5418$  Å) at a current of 30 mA and a voltage of 40 kV. EXAFS was performed on Table XAFS-500 (Speccreation Instruments Co., Ltd).

### Electrochemical Characterization

A catalyst ink was prepared by ultrasonically dispersing 5.0 mg of the synthetic catalyst for 1 h in a mixture containing 750  $\mu$ L isopropanol, 220  $\mu$ L DI water, and 30  $\mu$ L Nafion solution. The

catalyst ink was deposited onto a gas diffusion layer (GDL; effective catalytic area: 1 cm<sup>2</sup>) at a loading of 0.5, 1.5 and 2.5 mg cm<sup>-2</sup> and dried overnight under ambient conditions.

All electrochemical measurements were performed using a CHI 760E workstation in a flow-cell configuration with the synthesized catalyst as the working electrode, a Hg/Hg<sub>2</sub>Cl<sub>2</sub> (saturated KCl) reference electrode, and a coated titanium anode (Dimensionally Stable Anode, DSA) counter electrode, separated by a Nafion 211 membrane (pre-treated sequentially: 5 wt% H<sub>2</sub>O<sub>2</sub> at 80 °C for 3 h; DI-water at 80 °C for 1 h; 0.5 M H<sub>2</sub>SO<sub>4</sub> at 80 °C for 2 h; 0.5 M H<sub>2</sub>SO<sub>4</sub> at 100 °C for 8 h; DI-water at 80 °C for 1 h; final DI-water rinse). 0.1 M Na<sub>2</sub>SO<sub>4</sub> electrolyte and 0.05 M H<sub>2</sub>SO<sub>4</sub> absorption liquid flowed at 40 mL min<sup>-1</sup>, with gas flow at 20 mL min<sup>-1</sup>.

All measured potentials in this study were converted to the reversible hydrogen electrode (RHE) scale using the equation:  $E_{\text{RHE}} = E_{\text{Hg}/\text{Hg}_2\text{Cl}_2} + 0.059 \times \text{pH} + 0.242$ . Prior to electrochemical testing, all consumables—including working electrodes, reaction vessels, membranes, and electrolytes—were thoroughly cleaned. Nitrogen fixation activity was activated through cyclic voltammetry (CV) at 50 mV s<sup>-1</sup> from -1.2 to 0 V (*vs.* RHE), followed by chronoamperometry at various potentials for 1 h under continuous N<sub>2</sub> bubbling.

### **Determination of NH<sub>3</sub> by Indophenol Blue Method**

Following chronopotentiometry test, catholyte, anolyte, and twice absorption liquid was collected. The corresponding membrane was immersed in 50 mL of 0.05 M H<sub>2</sub>SO<sub>4</sub> for 24 h. All solutions were analyzed to assess nitrogen fixation performance.

For preparation of chromogenic reagents, 2.0 mL of 1 M NaOH solution was dissolved in 5 wt% of sodium citrate and 5 wt% of salicylic acid as solution A, and 1.0 mL of 0.05 M NaClO solution and 0.2 mL 1 wt% of C<sub>5</sub>FeN<sub>6</sub>Na<sub>2</sub>O aqueous solution were label as B and C.

Then, 2.0 mL aliquots of the test solutions were sequentially mixed with chromogenic reagents A, B, and C. The mixture was incubated in darkness at ambient temperature for 2 h, followed by UV-Vis measurements across 550 ~ 750 nm. Ammonia concentration was determined spectrophotometrically by comparing absorption peaks at 655 nm between N<sub>2</sub>-saturated systems.

### **Calculations for Faradic Efficiency (FE) and NH<sub>3</sub> Yield**

The FE and NH<sub>3</sub> Yield are calculated as follows:

$$FE = 3F \times c(\text{NH}_3) \times \frac{V}{17 \times Q}$$

$$\text{Yield} = c(\text{NH}_3) \times V / (t \times m)$$

Where  $F$  is Faradic constant,  $c(\text{NH}_3)$  is NH<sub>3</sub> concentration,  $V$  is the volume of electrolyte,  $t$  is the reaction time and  $m$  is the catalyst mass.

## Supplementary Figures

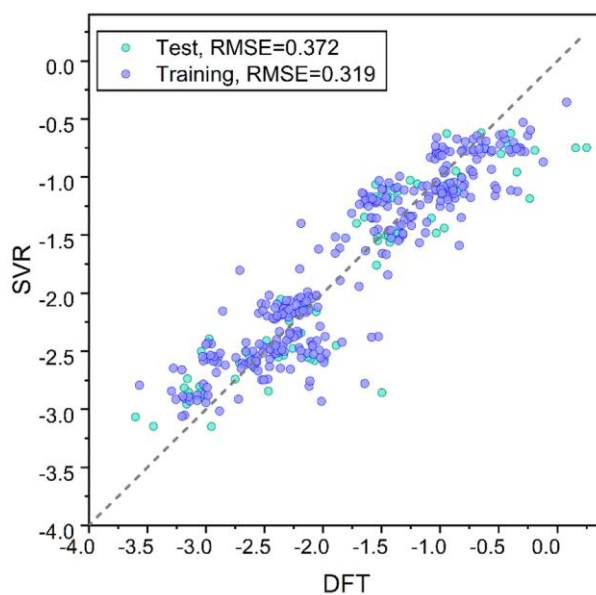

**Figure S1** Prediction performance of SVR (Support Vector Regression, kernel='linear', epsilon=0.4) plot between DFT-Calculations and Machine Learning Outputs. The result of 100 random leave-n-out trials is the MAE value of 0.259, the RMSE value of 0.363 and the  $R^2$  score of 0.839.

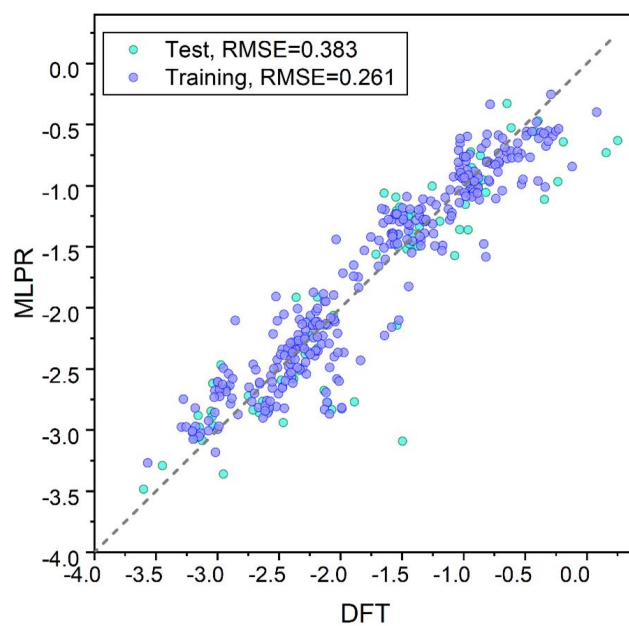

**Figure S2** Prediction performance of MLPR (Multi-layer Perceptron Regressor, solver='lbfgs', alpha=0.0001, max-iter=10000) plot between DFT-Calculations and Machine Learning Outputs. The result of 100 random leave-n-out trials is the MAE value of 0.276, the RMSE value of 0.362 and the  $R^2$  score of 0.802.

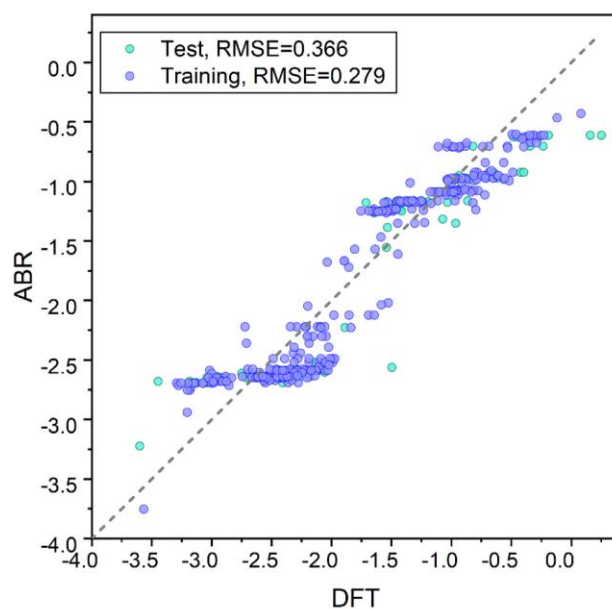

**Figure S3** Prediction performance of ABR (Ada Boost Regressor) plot between DFT-Calculations and Machine Learning Outputs. The result of 100 random leave-n-out trials is the MAE value of 0.307, the RMSE value of 0.240 and the  $R^2$  score of 0.872.

|                | RFR   | GBR   | LR    | Bagging |
|----------------|-------|-------|-------|---------|
| MAE            | 0.135 | 0.116 | 0.248 | 0.139   |
| RMSE           | 0.219 | 0.172 | 0.334 | 0.227   |
| R <sup>2</sup> | 0.933 | 0.962 | 0.843 | 0.927   |

**Figure S4** The table which shows MAE, RMSE, and R<sup>2</sup> of four ML models.

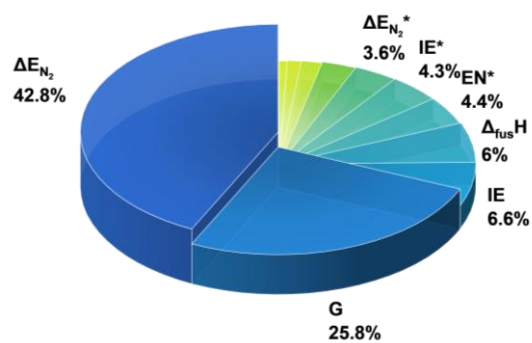

**Figure S5** Feature importance heatmap for the GBR (importance data was normalized after removing out two features,  $N_N$  and  $N_H$ ).

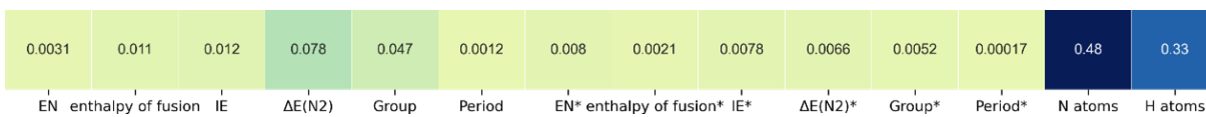

**Figure S6** Feature importance heatmap for the GBR.

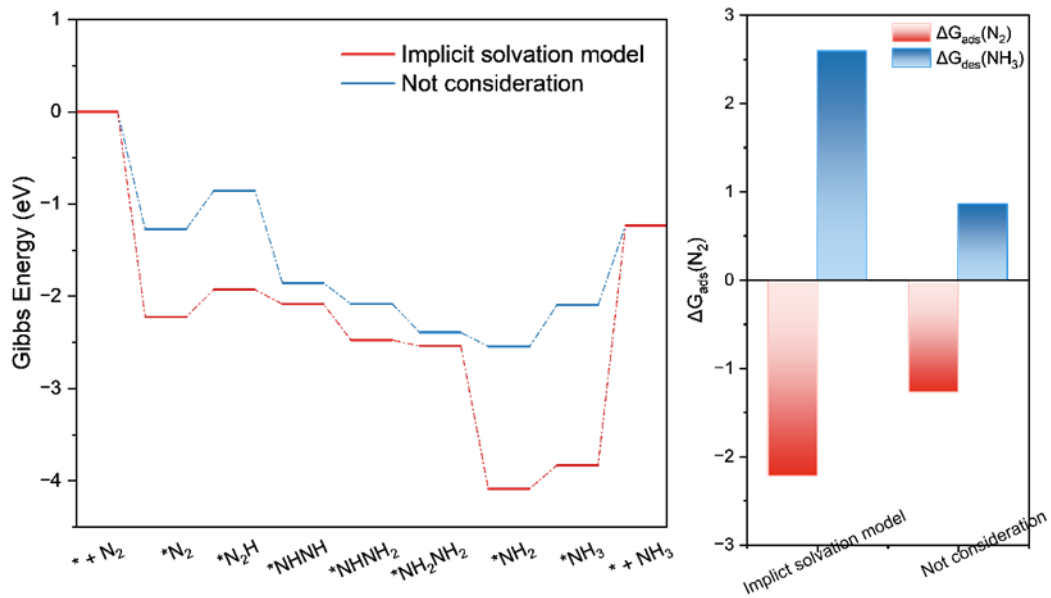

**Figure S7** NRR energy diagrams for CrNi/MoSe<sub>2</sub> via enzymatic mechanism with and without implicit solvation model (left); the bar graph of N<sub>2</sub> adsorption energy and NH<sub>3</sub> desorption energy with and without implicit solvation model (right).

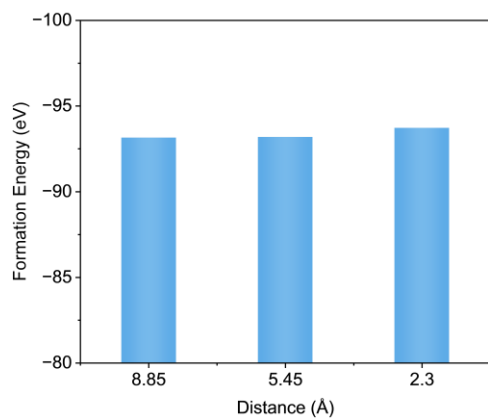

**Figure S8** The formation energies of next-next-nearest neighbor ( $\sim 8.85$  Å), next-nearest neighbor ( $\sim 5.45$  Å) to nearest neighbor ( $\sim 2.30$  Å).

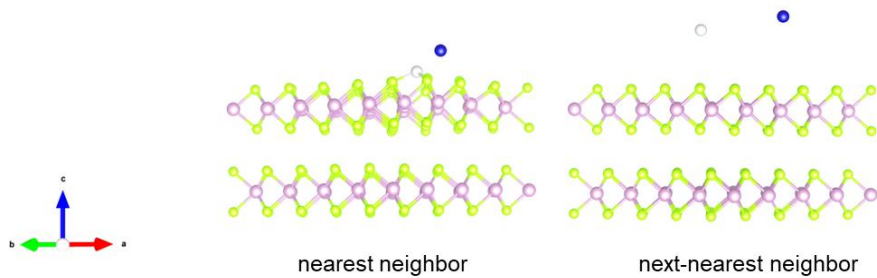

**Figure S9** Configurations of nearest neighbor and next-nearest neighbor after structural optimization. (green balls, light rose balls, blue balls, grey balls and purple balls represent of Mo, Se, Cr, Ni, and N atoms).

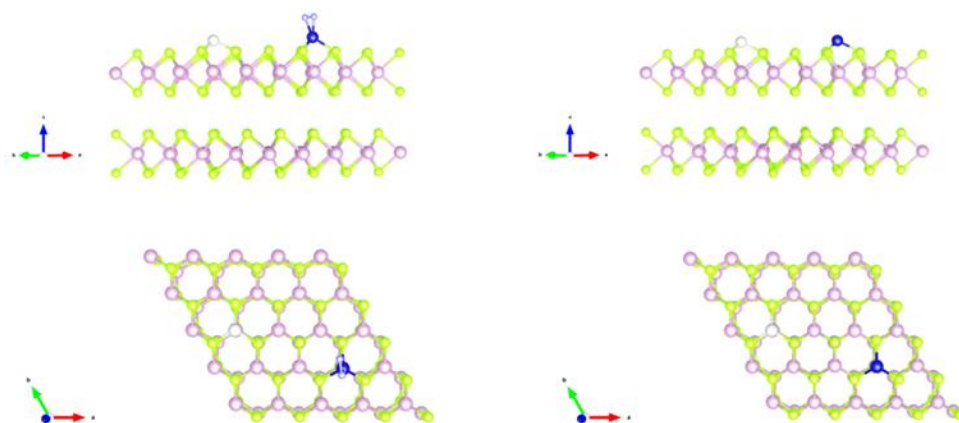

**Figure S10** next-next-nearest neighbor (right) and relevant  $*N_2$  (left) configurations after structural optimization. (green balls, light rose balls, blue balls, grey balls and purple balls represent of Mo, Se, Cr, Ni, and N atoms).

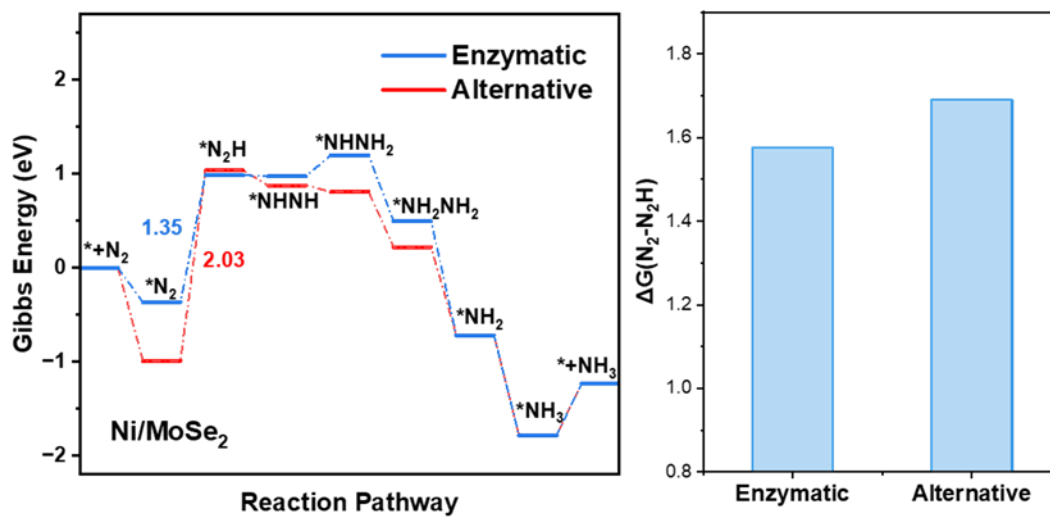

**Figure S11** Free energy diagrams in NRR via enzymatic and alternative mechanisms in Ni sites of Ni/MoSe<sub>2</sub> (Left);  $\Delta G(N_2-N_2H)$  comparison in Ni sites of CrNi/MoSe<sub>2</sub> via enzymatic and alternative mechanisms (Right).

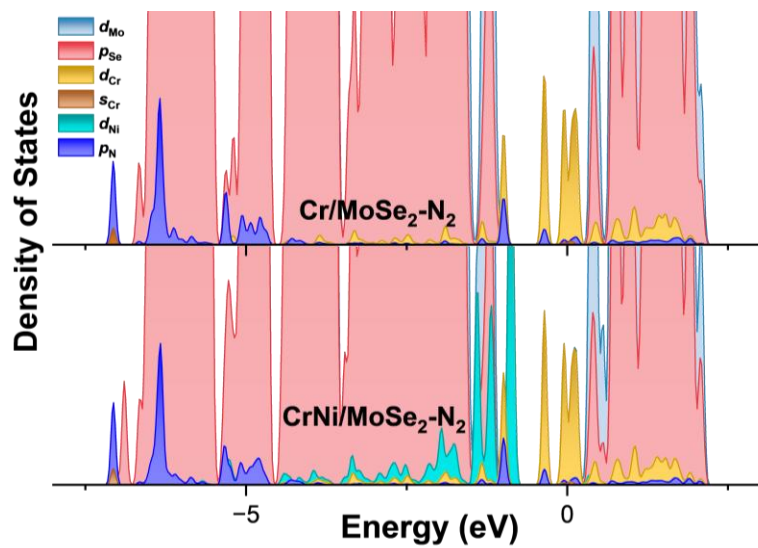

**Figure S12** Simulated density of states (DOS) profiles of CrNi/MoSe<sub>2</sub>-N<sub>2</sub> and Cr/MoSe<sub>2</sub>-N<sub>2</sub>.

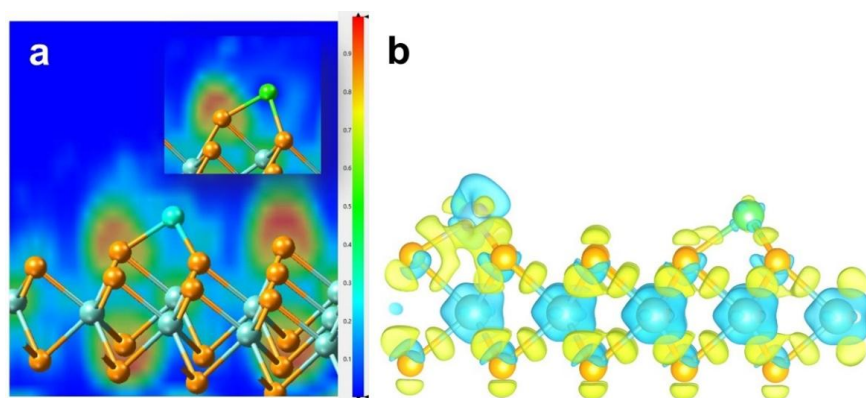

**Figure S13** (a) Calculated electron location function (ELF) and (b) charge difference of CrNi/MoSe<sub>2</sub>. Yellow, blue, aqua and green balls represent Se, Mo, Cr and Ni atoms; Green and blue regions represent electron accumulation and electron depletion, respectively.

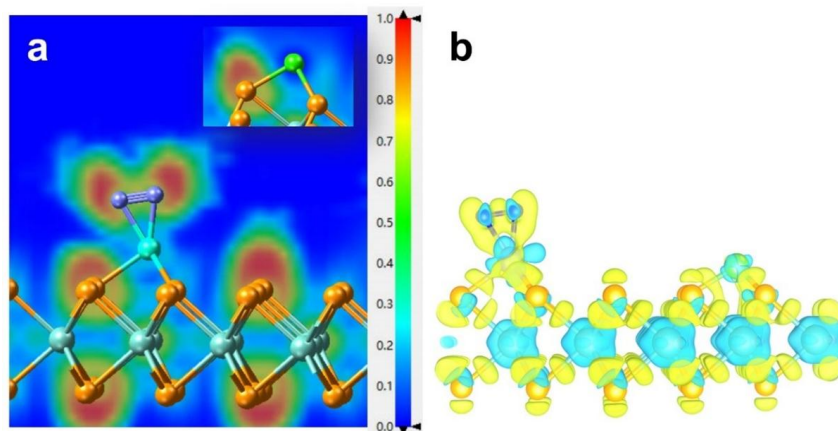

**Figure S14** (a) Calculated electron location function (ELF) and (b) charge difference of CrNi/MoSe<sub>2</sub>-N<sub>2</sub>. Yellow, blue, aqua and green balls represent Se, Mo, Cr and Ni atoms; Green and blue regions represent electron accumulation and electron depletion, respectively.

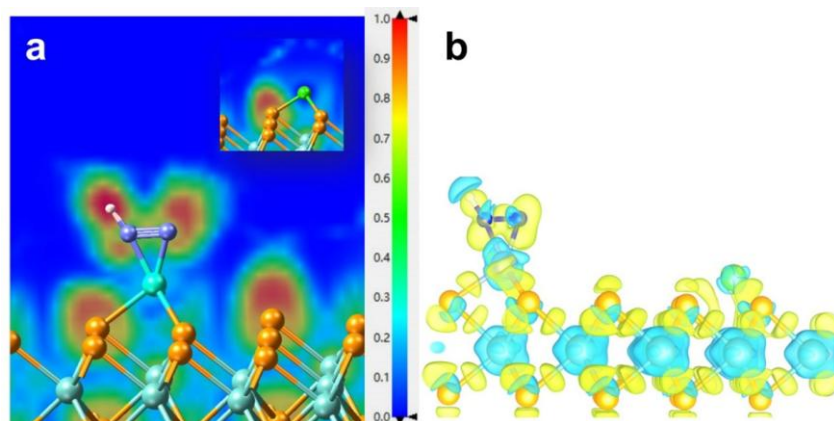

**Figure S15** (a) Calculated electron location function (ELF) and (b) charge difference of CrNi/MoSe<sub>2</sub>-N<sub>2</sub>H. Yellow, blue, aqua and green, white balls represent Se, Mo, Cr and Ni, H atoms; Green and blue regions represent electron accumulation and electron depletion, respectively.

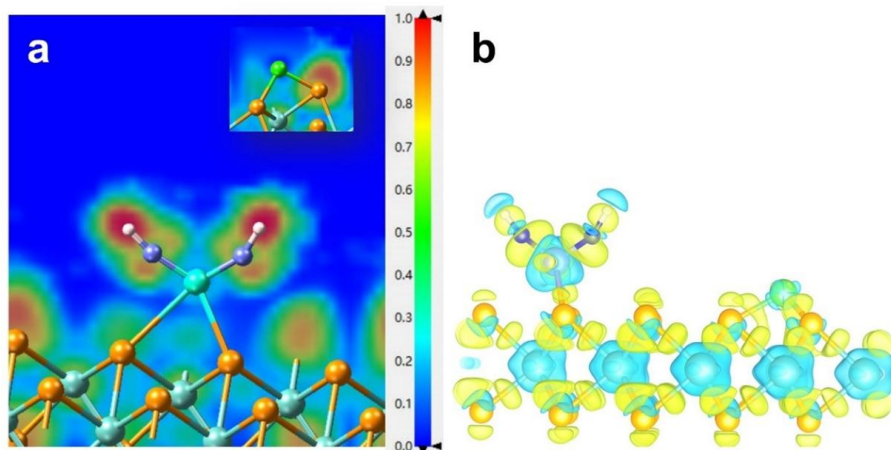

**Figure S16** (a) Calculated electron location function (ELF) and (b) charge difference of CrNi/MoSe<sub>2</sub>-N<sub>2</sub>H<sub>2</sub>. Yellow, blue, aqua and green, white balls represent Se, Mo, Cr and Ni, H atoms; Green and blue regions represent electron accumulation and electron depletion, respectively.

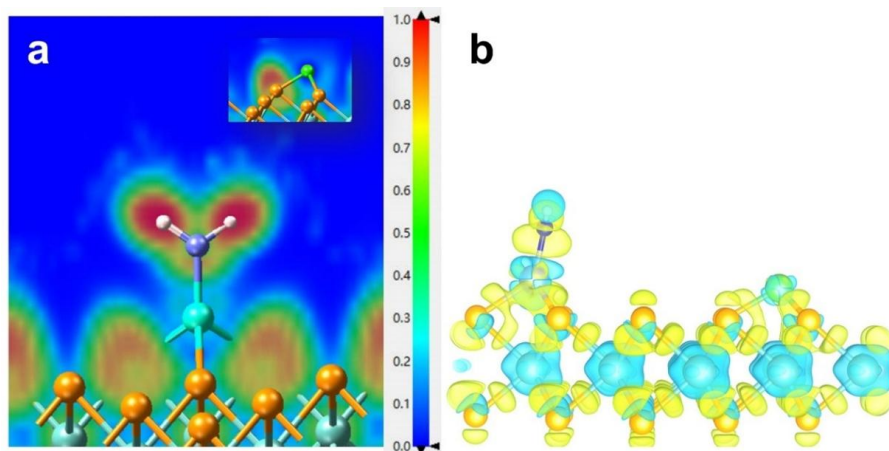

**Figure S17** (a) Calculated electron location function (ELF) and (b) charge difference of CrNi/MoSe<sub>2</sub>-NH<sub>2</sub>. Yellow, blue, aqua and green, white balls represent Se, Mo, Cr and Ni, H atoms; Green and blue regions represent electron accumulation and electron depletion, respectively.

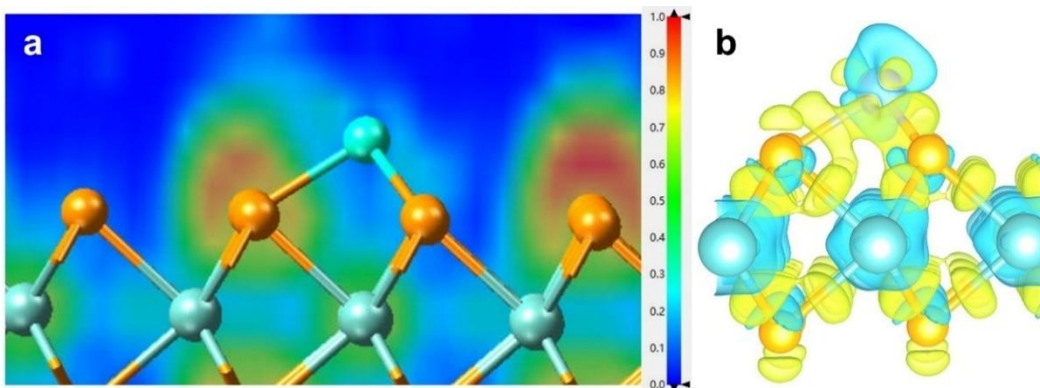

**Figure S18** (a) Calculated electron location function (ELF) and (b) charge difference of Cr/MoSe<sub>2</sub>. Yellow, blue and aqua balls represent Se, Mo and Cr atoms; Green and blue regions represent electron accumulation and electron depletion, respectively.

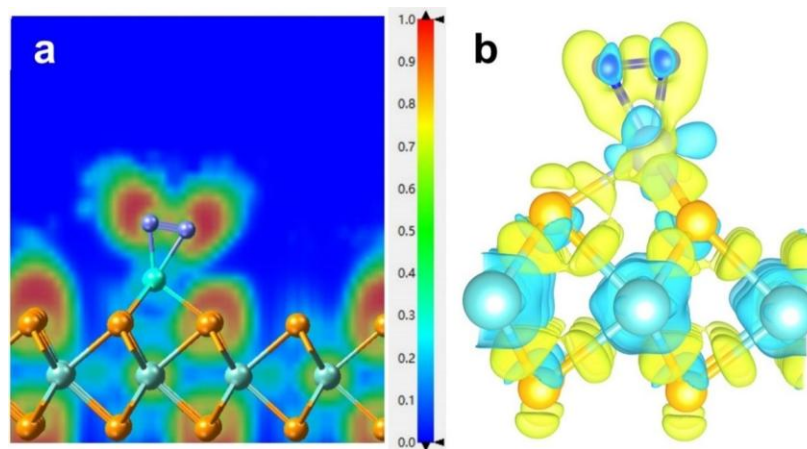

**Figure S19** (a) Calculated electron location function (ELF) and (b) charge difference of Cr/MoSe<sub>2</sub>-N<sub>2</sub>. Yellow, blue and aqua balls represent Se, Mo and Cr atoms; Green and blue regions represent electron accumulation and electron depletion, respectively.

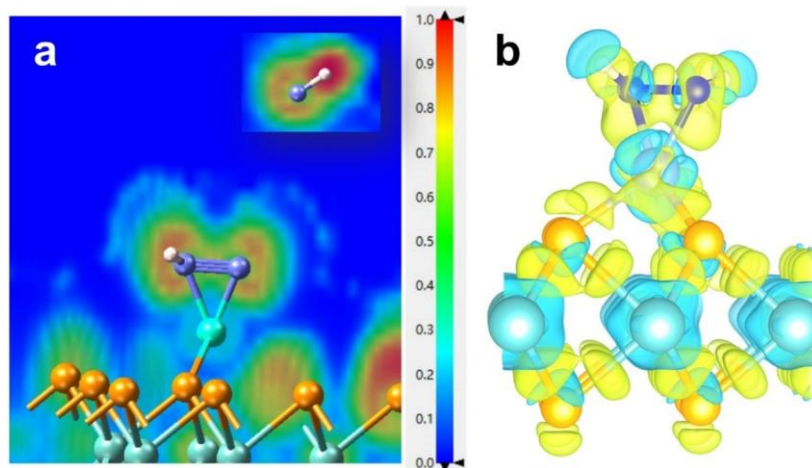

**Figure S20** (a) Calculated electron location function (ELF) and (b) charge difference of Cr/MoSe<sub>2</sub>-N<sub>2</sub>H<sub>2</sub>. Yellow, blue and aqua, while balls represent Se, Mo and Cr, H atoms; Green and blue regions represent electron accumulation and electron depletion, respectively.

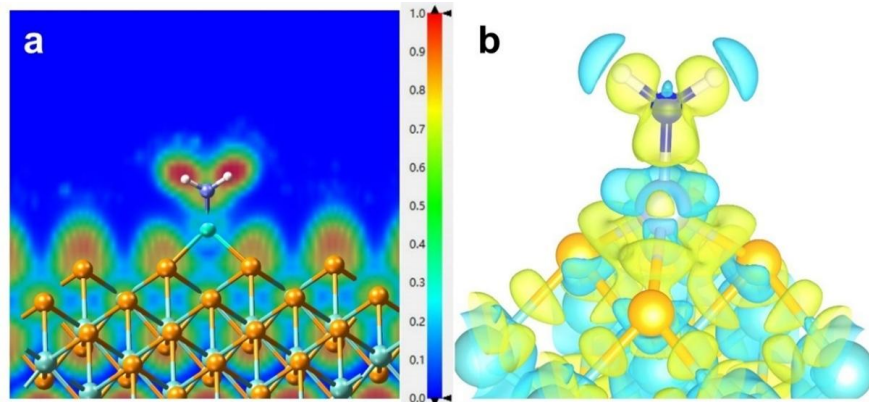

**Figure S21** (a) Calculated electron location function (ELF) and (b) charge difference of Cr/MoSe<sub>2</sub>-NH<sub>2</sub>. Yellow, blue and aqua, white balls represent Se, Mo and Cr, H atoms; Green and blue regions represent electron accumulation and electron depletion, respectively.

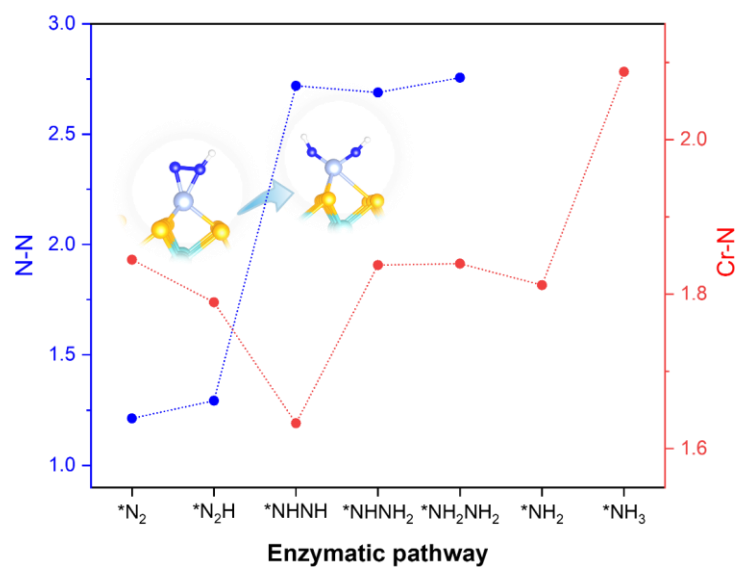

**Figure S22** N-N and Cr-N bond length of intermediates for CrNi/MoSe<sub>2</sub> via enzymatic mechanism. The bond distance during the hydrogenation step of \*N<sub>2</sub>H to \*NHNH indicates a sharp increase in N-N bond length and according decrease in Cr-N bond length. Immediately after, The Cr-N bond distance indicates gradual increase during the reduction steps of \*NHNH to \*NH<sub>2</sub>.

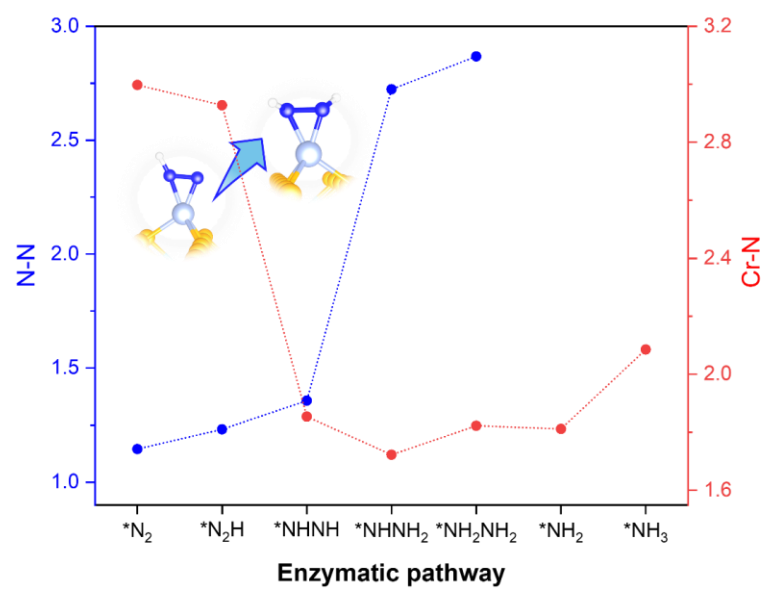

**Figure S23** N-N and Cr-N bond length of intermediates for Cr/MoSe<sub>2</sub> via enzymatic mechanism.

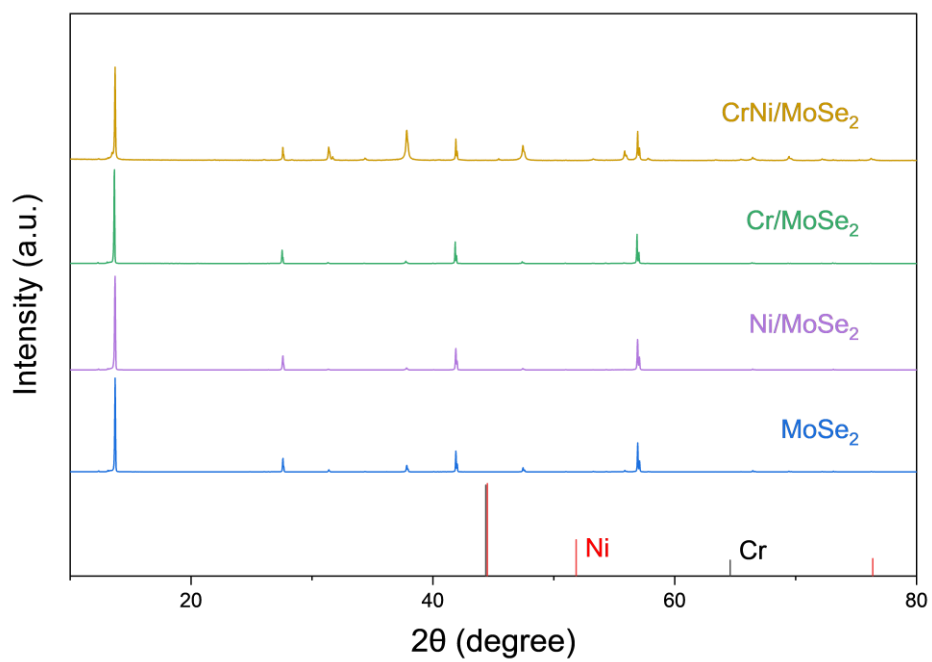

**Figure S24** XRD spectra of CrNi/MoSe<sub>2</sub>, Cr/MoSe<sub>2</sub>, Ni/MoSe<sub>2</sub>, MoSe<sub>2</sub> and the Ni and Cr standard.

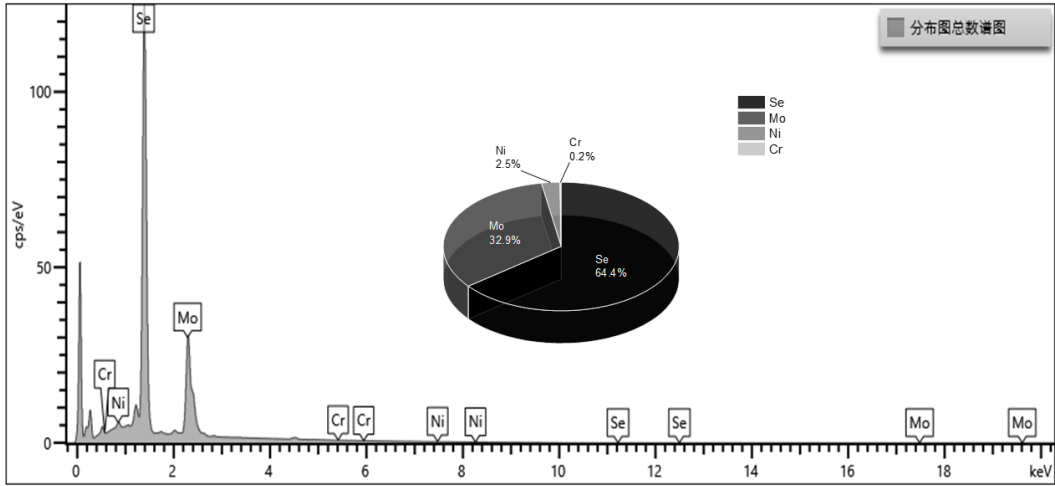

**Figure S25** SEM-EDS spectra of CrNi/MoSe<sub>2</sub> and atomic ratio of Ni, Cr, Mo and Se (the inset).

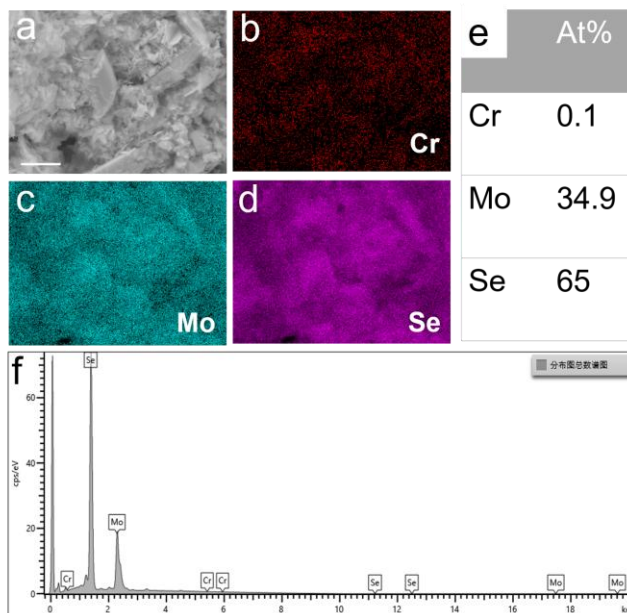

**Figure S26** Morphological characterization of Cr/MoSe<sub>2</sub> nanosheets. (a) SEM image (scale bar, 2 μm); (b-d) SEM element mappings of Cr, Mo and Se; (e) Atomic ratio of Cr, Mo and Se; (f) SEM EDS spectra.

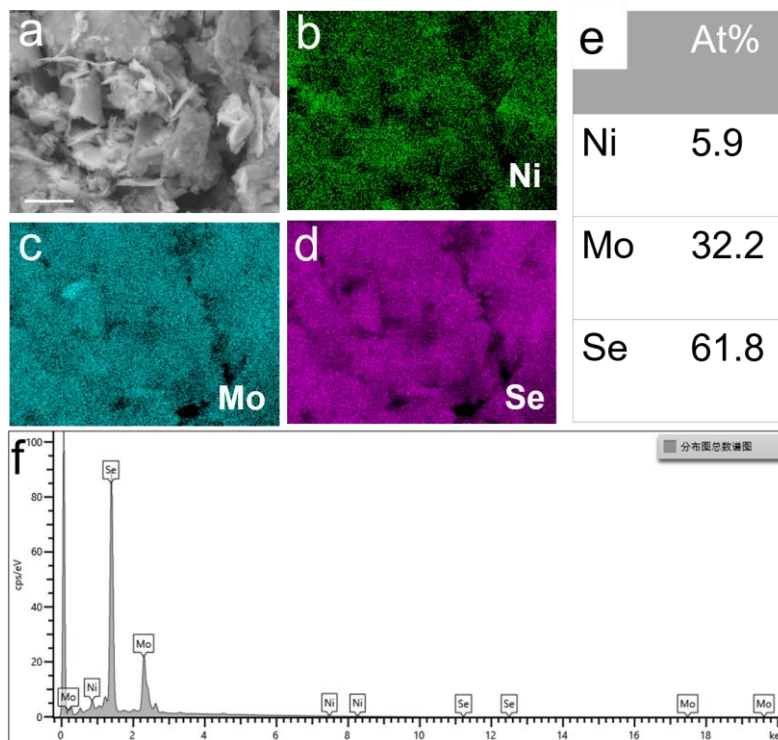

**Figure S27** Morphological characterization of Ni/MoSe<sub>2</sub> nanosheets. (a) SEM image (scale bar, 2 μm); (b-d) SEM element mappings of Ni, Mo and Se; (e) Atomic ratio of Ni, Mo and Se; (f) SEM EDS spectra.

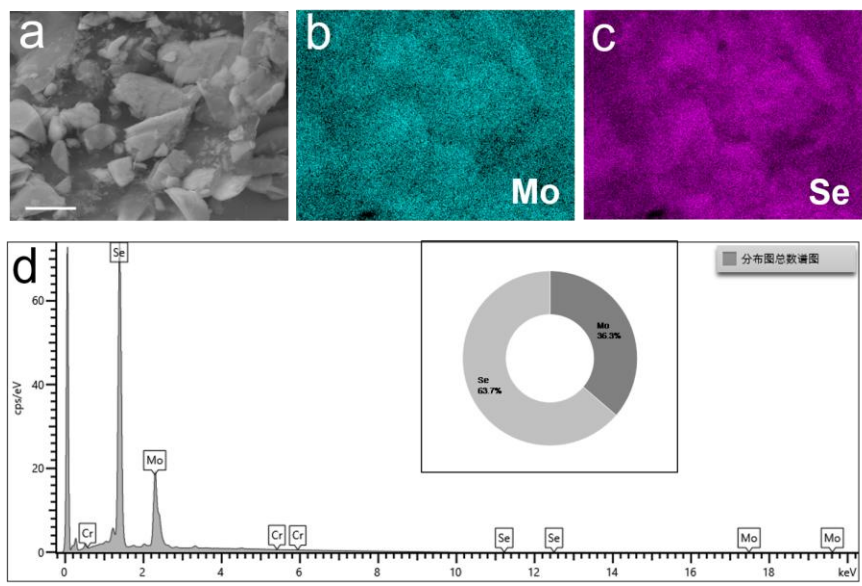

**Figure S28** Morphological characterization of MoSe<sub>2</sub> nanosheets. (a) SEM image (scale bar, 2 μm); (b, c) SEM element mappings of Mo and Se; (d) SEM EDS spectra and atomic ratio of Mo and Se (the inset).

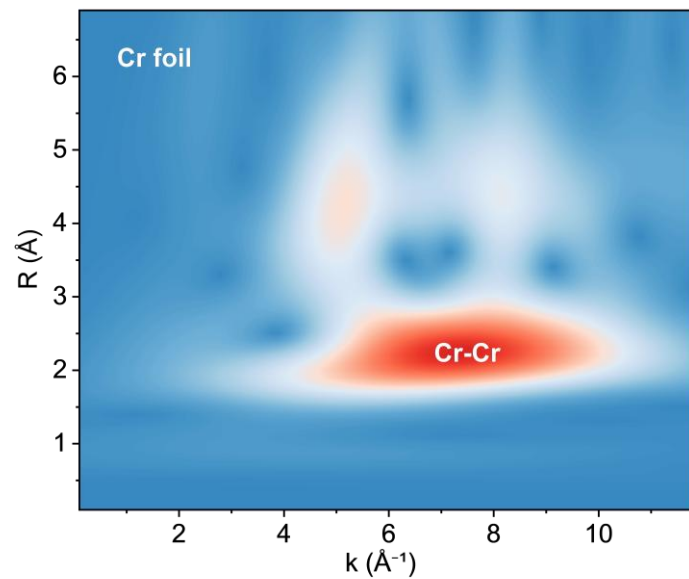

**Figure S29** Wavelet transform (WT)-EXAFS contour plots providing two-dimensional resolution of the Cr–Cr scattering paths in Cr foil.

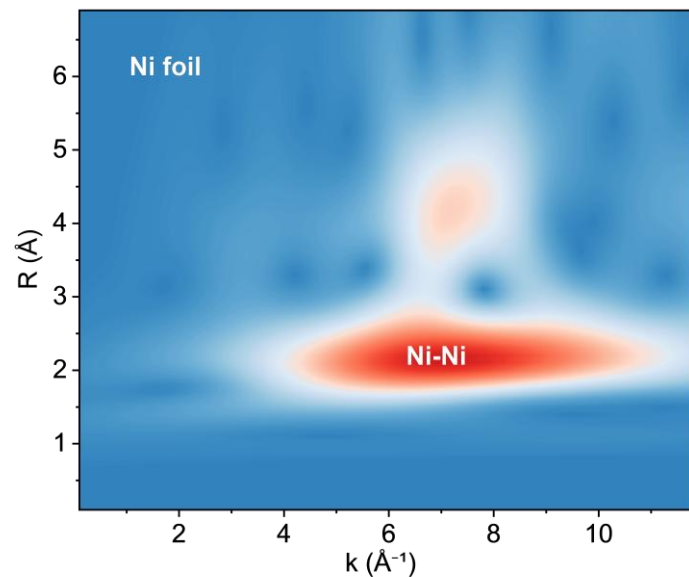

**Figure S30** Wavelet transform (WT)-EXAFS contour plots providing two-dimensional resolution of the Ni–Ni scattering paths in Ni foil.

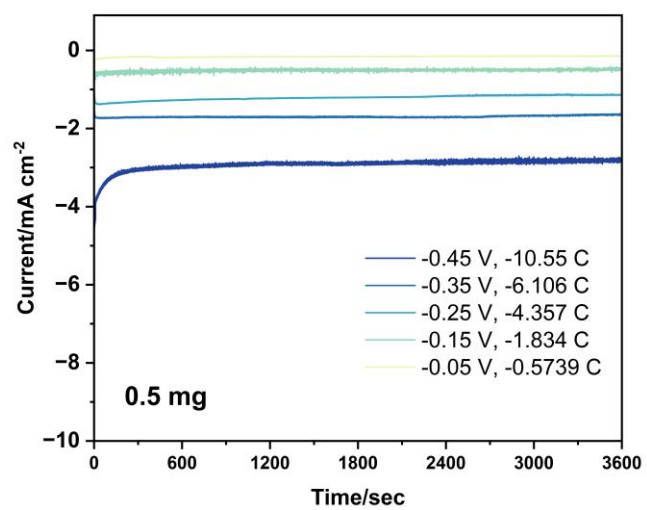

**Figure S31** Chronoamperometry curves of CrNi/MoSe<sub>2</sub> with loading mass of 0.5 mg cm<sup>-2</sup> at -0.05 ~ -0.45 V (vs. RHE).

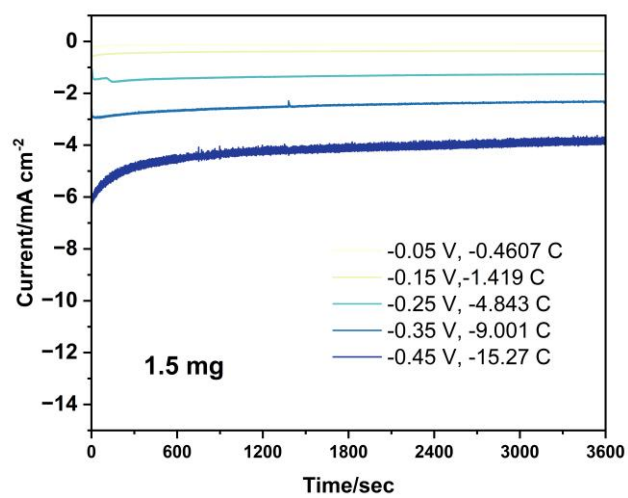

**Figure S32** Chronoamperometry curves of CrNi/MoSe<sub>2</sub> with loading mass of 1.5 mg cm<sup>-2</sup> at -0.05 ~ -0.45 V (vs. RHE).

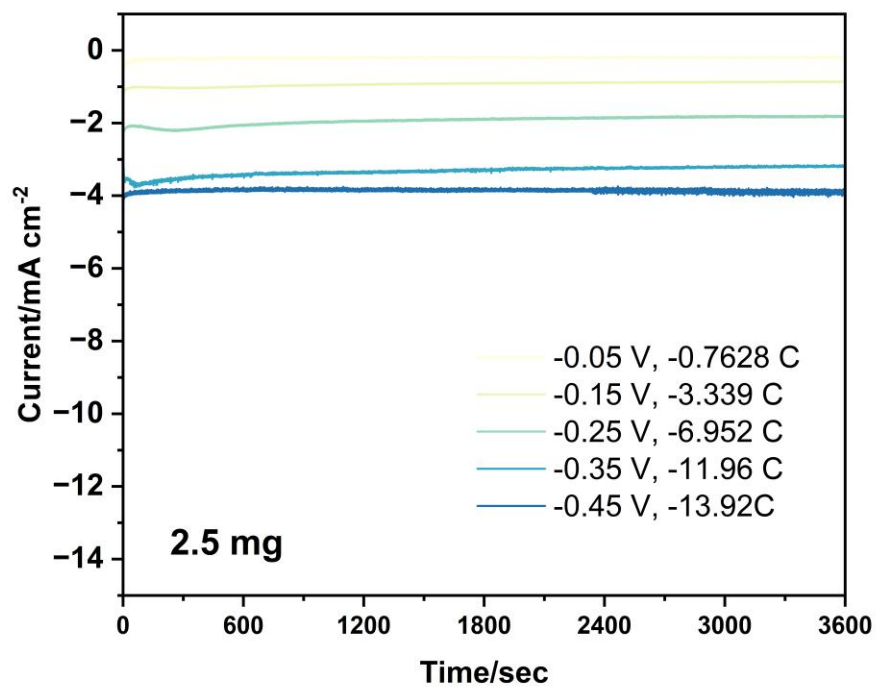

**Figure S33** Chronoamperometry curves of CrNi/MoSe<sub>2</sub> with loading mass of 2.5 mg cm<sup>-2</sup> at -0.05 ~ -0.45 V (vs. RHE).

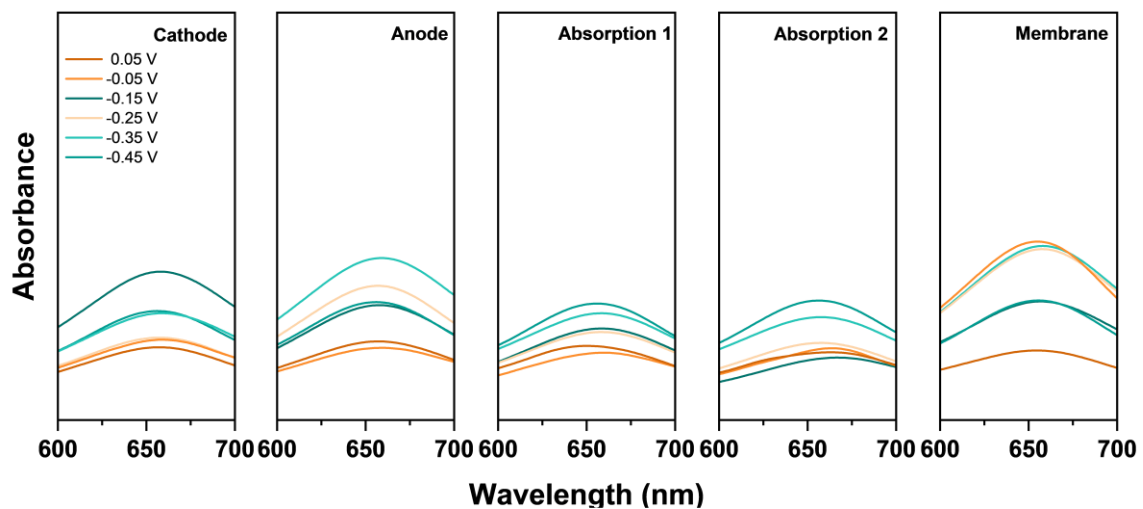

**Figure S34** UV-vis absorption spectrum of CrNi/MoSe<sub>2</sub> (loading mass: 0.5 mg cm<sup>-2</sup>) electrode after potentiostatic tests at different potentials in N<sub>2</sub>-saturated 0.1 M Na<sub>2</sub>SO<sub>4</sub> solutions.

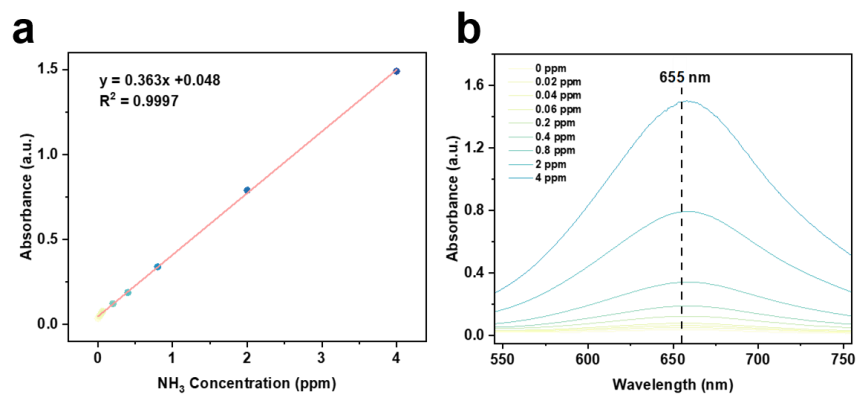

**Figure S35** Calibration curve for NH<sub>3</sub> using a known concentration of NH<sub>4</sub>Cl solution in 0.1 M Na<sub>2</sub>SO<sub>4</sub> solution. (a) UV-vis absorption spectra of indophenol assays with different NH<sub>3</sub> concentrations after incubated for 2 h; (b) Calibration curve used for estimation of NH<sub>3</sub> concentrations.

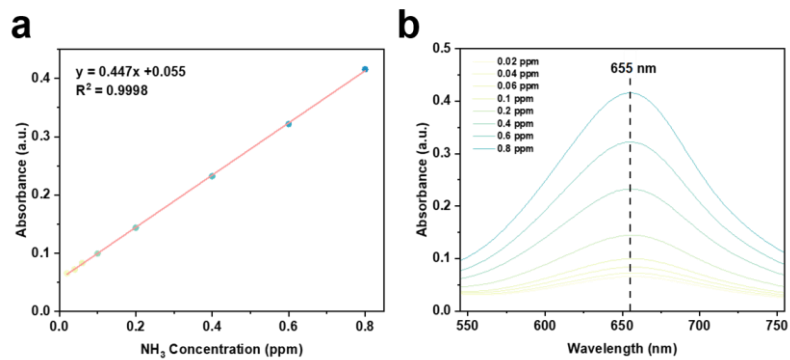

**Figure S36** Calibration curve for NH<sub>3</sub> using a known concentration of NH<sub>4</sub>Cl solution in 0.05 M H<sub>2</sub>SO<sub>4</sub> solution. (a) UV-vis absorption spectra of indophenol assays with different NH<sub>3</sub> concentrations after incubated for 2 h; (b) Calibration curve used for estimation of NH<sub>3</sub> concentrations.

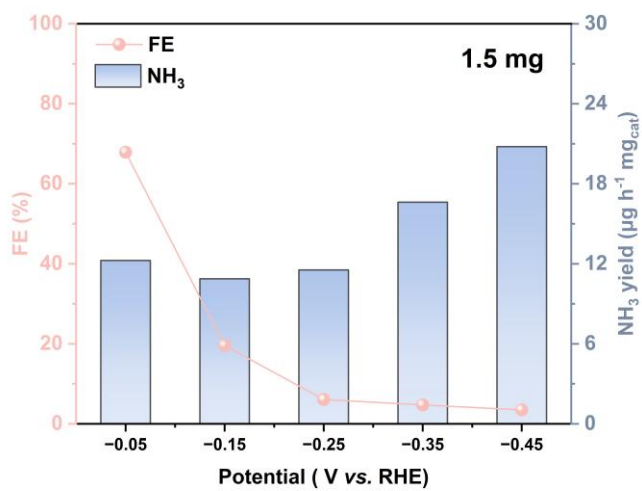

**Figure S37** NH<sub>3</sub> yields and FEs of CrNi/MoSe<sub>2</sub> with loading mass of 1.5 mg cm<sup>-2</sup> at different applied potentials.

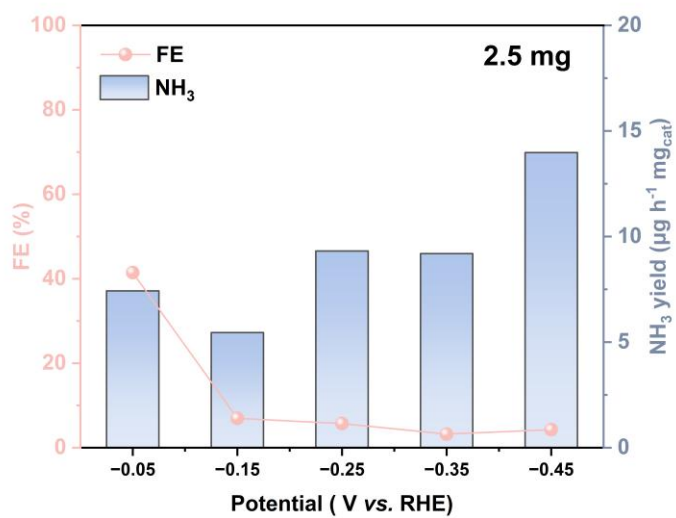

**Figure S38** NH<sub>3</sub> yields and FEs of CrNi/MoSe<sub>2</sub> with loading mass of 2.5 mg cm<sup>-2</sup> at different applied potentials.

## Supplementary Tables

**Table S1** Adsorption energy calculated through DFT and machine learning by GBR model for the data set.

| Catalyst               | Adsorption Species | DFT/eV | GBR/eV | Type of data |
|------------------------|--------------------|--------|--------|--------------|
| CoFe/MoSe <sub>2</sub> | *N <sub>2</sub> H  | -0.292 | -0.319 | training     |
| CoRh/MoSe <sub>2</sub> | *NH <sub>2</sub>   | -1.527 | -1.588 | training     |
| CoSc/MoSe <sub>2</sub> | *NH <sub>2</sub>   | -1.586 | -1.620 | training     |
| CrFe/MoSe <sub>2</sub> | *NH <sub>2</sub>   | -2.912 | -2.930 | training     |
| FeAg/MoSe <sub>2</sub> | *N <sub>2</sub> H  | -0.651 | -0.689 | training     |
| FeAg/MoSe <sub>2</sub> | *NH <sub>3</sub>   | -2.156 | -2.155 | training     |
| FeAg/MoSe <sub>2</sub> | *N <sub>2</sub>    | -1.367 | -1.337 | training     |
| FeCd/MoSe <sub>2</sub> | *NH <sub>3</sub>   | -2.210 | -2.147 | training     |
| FeCd/MoSe <sub>2</sub> | *NH <sub>2</sub>   | -2.091 | -2.094 | training     |
| FeCd/MoSe <sub>2</sub> | *N <sub>2</sub>    | -1.194 | -1.284 | test         |
| FeCo/MoSe <sub>2</sub> | *NH <sub>2</sub>   | -2.090 | -2.107 | training     |
| FeCo/MoSe <sub>2</sub> | *N <sub>2</sub> H  | -0.686 | -0.665 | training     |
| FeCo/MoSe <sub>2</sub> | *N <sub>2</sub>    | -1.438 | -1.319 | training     |
| FeCr/MoSe <sub>2</sub> | *NH <sub>2</sub>   | -2.105 | -2.091 | training     |
| FeCr/MoSe <sub>2</sub> | *N <sub>2</sub> H  | -0.649 | -0.695 | test         |
| FeCu/MoSe <sub>2</sub> | *NH <sub>2</sub>   | -1.839 | -1.989 | training     |
| FeCu/MoSe <sub>2</sub> | *NH <sub>3</sub>   | -2.057 | -2.049 | training     |
| FeCu/MoSe <sub>2</sub> | *N <sub>2</sub>    | -1.257 | -1.163 | test         |
| FeCu/MoSe <sub>2</sub> | *N <sub>2</sub> H  | -0.398 | -0.539 | test         |
| FeHf/MoSe <sub>2</sub> | *NH <sub>2</sub>   | -1.992 | -2.089 | training     |
| FeHf/MoSe <sub>2</sub> | *NH <sub>3</sub>   | -2.202 | -2.093 | training     |
| FeHf/MoSe <sub>2</sub> | *N <sub>2</sub> H  | -0.649 | -0.694 | training     |
| FeHf/MoSe <sub>2</sub> | *N <sub>2</sub>    | -1.359 | -1.343 | training     |
| FeIr/MoSe <sub>2</sub> | *NH <sub>3</sub>   | -2.313 | -2.215 | training     |
| FeIr/MoSe <sub>2</sub> | *N <sub>2</sub> H  | -0.720 | -0.734 | training     |
| FeIr/MoSe <sub>2</sub> | *NH <sub>2</sub>   | -2.106 | -2.203 | test         |
| FeIr/MoSe <sub>2</sub> | *N <sub>2</sub>    | -1.546 | -1.387 | test         |
| FeMn/MoSe <sub>2</sub> | *N <sub>2</sub> H  | -0.786 | -0.688 | training     |
| FeMn/MoSe <sub>2</sub> | *NH <sub>2</sub>   | -2.190 | -2.083 | training     |
| FeMo/MoSe <sub>2</sub> | *N <sub>2</sub> H  | -0.609 | -0.709 | training     |
| FeMo/MoSe <sub>2</sub> | *N <sub>2</sub>    | -1.386 | -1.358 | training     |
| FeMo/MoSe <sub>2</sub> | *NH <sub>2</sub>   | -2.030 | -2.082 | training     |
| FeNb/MoSe <sub>2</sub> | *NH <sub>3</sub>   | -2.046 | -2.066 | training     |
| FeOs/MoSe <sub>2</sub> | *N <sub>2</sub> H  | -0.713 | -0.744 | training     |
| FeOs/MoSe <sub>2</sub> | *NH <sub>3</sub>   | -2.260 | -2.220 | training     |
| FeOs/MoSe <sub>2</sub> | *N <sub>2</sub>    | -1.455 | -1.397 | training     |
| FeOs/MoSe <sub>2</sub> | *NH <sub>2</sub>   | -2.072 | -2.197 | test         |

|                              |                   |        |        |          |
|------------------------------|-------------------|--------|--------|----------|
| <b>FePt/MoSe<sub>2</sub></b> | *NH <sub>2</sub>  | -1.991 | -2.088 | training |
| <b>FePt/MoSe<sub>2</sub></b> | *NH <sub>3</sub>  | -2.204 | -2.133 | training |
| <b>FePt/MoSe<sub>2</sub></b> | *N <sub>2</sub> H | -0.558 | -0.643 | training |
| <b>FeRh/MoSe<sub>2</sub></b> | *N <sub>2</sub> H | -0.620 | -0.685 | training |
| <b>FeRh/MoSe<sub>2</sub></b> | *N <sub>2</sub>   | -1.450 | -1.334 | test     |
| <b>FeRh/MoSe<sub>2</sub></b> | *NH <sub>2</sub>  | -2.135 | -2.110 | test     |
| <b>FeRu/MoSe<sub>2</sub></b> | *NH <sub>3</sub>  | -2.321 | -2.208 | training |
| <b>FeRu/MoSe<sub>2</sub></b> | *NH <sub>2</sub>  | -2.131 | -2.196 | training |
| <b>FeRu/MoSe<sub>2</sub></b> | *N <sub>2</sub>   | -1.363 | -1.398 | test     |
| <b>FeSc/MoSe<sub>2</sub></b> | *NH <sub>2</sub>  | -2.023 | -2.098 | training |
| <b>FeSc/MoSe<sub>2</sub></b> | *N <sub>2</sub> H | -0.615 | -0.720 | test     |
| <b>FeTi/MoSe<sub>2</sub></b> | *N <sub>2</sub> H | -0.490 | -0.611 | training |
| <b>FeTi/MoSe<sub>2</sub></b> | *NH <sub>2</sub>  | -1.975 | -2.023 | training |
| <b>FeTi/MoSe<sub>2</sub></b> | *N <sub>2</sub> H | -0.424 | -0.611 | test     |
| <b>FeV/MoSe<sub>2</sub></b>  | *NH <sub>2</sub>  | -2.053 | -2.090 | training |
| <b>FeY/MoSe<sub>2</sub></b>  | *N <sub>2</sub>   | -1.331 | -1.363 | training |
| <b>FeY/MoSe<sub>2</sub></b>  | *NH <sub>3</sub>  | -2.026 | -2.068 | training |
| <b>FeZn/MoSe<sub>2</sub></b> | *NH <sub>3</sub>  | -2.095 | -2.129 | training |
| <b>FeZn/MoSe<sub>2</sub></b> | *NH <sub>2</sub>  | -1.890 | -2.086 | test     |
| <b>HfSc/MoSe<sub>2</sub></b> | *N <sub>2</sub> H | -1.346 | -1.181 | training |
| <b>HfSc/MoSe<sub>2</sub></b> | *N <sub>2</sub>   | -1.714 | -1.619 | test     |
| <b>HfTi/MoSe<sub>2</sub></b> | *NH <sub>3</sub>  | -2.285 | -2.359 | training |
| <b>HfTi/MoSe<sub>2</sub></b> | *N <sub>2</sub> H | -0.345 | -0.762 | test     |
| <b>HfV/MoSe<sub>2</sub></b>  | *N <sub>2</sub> H | -0.688 | -0.886 | training |
| <b>HfV/MoSe<sub>2</sub></b>  | *NH <sub>2</sub>  | -3.278 | -3.095 | training |
| <b>IrCo/MoSe<sub>2</sub></b> | *NH <sub>2</sub>  | -2.118 | -2.195 | training |
| <b>IrCo/MoSe<sub>2</sub></b> | *NH <sub>3</sub>  | -2.291 | -2.208 | training |
| <b>IrCu/MoSe<sub>2</sub></b> | *NH <sub>3</sub>  | -1.982 | -1.957 | training |
| <b>IrCu/MoSe<sub>2</sub></b> | *NH <sub>2</sub>  | -1.644 | -1.837 | training |
| <b>IrFe/MoSe<sub>2</sub></b> | *N <sub>2</sub> H | -0.791 | -0.885 | training |
| <b>IrFe/MoSe<sub>2</sub></b> | *N <sub>2</sub>   | -1.563 | -1.522 | training |
| <b>IrFe/MoSe<sub>2</sub></b> | *NH <sub>3</sub>  | -2.344 | -2.371 | training |
| <b>IrNi/MoSe<sub>2</sub></b> | *NH <sub>3</sub>  | -2.222 | -2.166 | training |
| <b>IrNi/MoSe<sub>2</sub></b> | *N <sub>2</sub>   | -1.268 | -1.272 | training |
| <b>IrNi/MoSe<sub>2</sub></b> | *N <sub>2</sub> H | -0.563 | -0.640 | training |
| <b>IrRu/MoSe<sub>2</sub></b> | *NH <sub>2</sub>  | -3.017 | -2.817 | training |
| <b>IrSc/MoSe<sub>2</sub></b> | *NH <sub>2</sub>  | -2.722 | -2.509 | training |
| <b>IrSc/MoSe<sub>2</sub></b> | *N <sub>2</sub> H | -0.890 | -0.954 | training |
| <b>IrTi/MoSe<sub>2</sub></b> | *N <sub>2</sub>   | -1.033 | -1.306 | test     |
| <b>IrV/MoSe<sub>2</sub></b>  | *NH <sub>3</sub>  | -2.220 | -2.287 | training |
| <b>IrV/MoSe<sub>2</sub></b>  | *N <sub>2</sub>   | -1.307 | -1.386 | training |
| <b>LaTi/MoSe<sub>2</sub></b> | *N <sub>2</sub>   | -0.120 | -0.157 | training |
| <b>LaV/MoSe<sub>2</sub></b>  | *NH <sub>2</sub>  | -2.857 | -2.945 | training |
| <b>LaV/MoSe<sub>2</sub></b>  | *N <sub>2</sub> H | 0.079  | 0.068  | training |
| <b>MnAg/MoSe<sub>2</sub></b> | *N <sub>2</sub>   | -1.667 | -1.618 | training |
| <b>MnAg/MoSe<sub>2</sub></b> | *N <sub>2</sub> H | -1.043 | -1.014 | training |

|                              |                   |        |        |          |
|------------------------------|-------------------|--------|--------|----------|
| <b>MnAg/MoSe<sub>2</sub></b> | *NH <sub>3</sub>  | -2.409 | -2.394 | training |
| <b>MnAg/MoSe<sub>2</sub></b> | *NH <sub>2</sub>  | -2.635 | -2.720 | test     |
| <b>MnAu/MoSe<sub>2</sub></b> | *N <sub>2</sub>   | -1.756 | -1.680 | training |
| <b>MnCd/MoSe<sub>2</sub></b> | *N <sub>2</sub>   | -1.489 | -1.530 | training |
| <b>MnCd/MoSe<sub>2</sub></b> | *NH <sub>3</sub>  | -2.487 | -2.356 | training |
| <b>MnCd/MoSe<sub>2</sub></b> | *NH <sub>2</sub>  | -2.662 | -2.662 | test     |
| <b>MnCu/MoSe<sub>2</sub></b> | *NH <sub>2</sub>  | -2.474 | -2.555 | training |
| <b>MnCu/MoSe<sub>2</sub></b> | *N <sub>2</sub> H | -0.857 | -0.832 | training |
| <b>MnCu/MoSe<sub>2</sub></b> | *NH <sub>3</sub>  | -2.282 | -2.256 | training |
| <b>MnCu/MoSe<sub>2</sub></b> | *N <sub>2</sub>   | -1.434 | -1.412 | test     |
| <b>MnFe/MoSe<sub>2</sub></b> | *NH <sub>2</sub>  | -2.745 | -2.685 | training |
| <b>MnFe/MoSe<sub>2</sub></b> | *NH <sub>3</sub>  | -2.514 | -2.359 | training |
| <b>MnHf/MoSe<sub>2</sub></b> | *N <sub>2</sub> H | -1.045 | -0.964 | training |
| <b>MnHf/MoSe<sub>2</sub></b> | *N <sub>2</sub>   | -1.613 | -1.568 | training |
| <b>MnHf/MoSe<sub>2</sub></b> | *NH <sub>3</sub>  | -2.289 | -2.300 | test     |
| <b>MnHf/MoSe<sub>2</sub></b> | *NH <sub>2</sub>  | -2.585 | -2.631 | test     |
| <b>MnIr/MoSe<sub>2</sub></b> | *N <sub>2</sub>   | -1.557 | -1.584 | training |
| <b>MnIr/MoSe<sub>2</sub></b> | *NH <sub>3</sub>  | -2.296 | -2.371 | training |
| <b>MnIr/MoSe<sub>2</sub></b> | *NH <sub>2</sub>  | -2.615 | -2.697 | training |
| <b>MnIr/MoSe<sub>2</sub></b> | *N <sub>2</sub> H | -0.984 | -0.980 | training |
| <b>MnLa/MoSe<sub>2</sub></b> | *NH <sub>2</sub>  | -2.523 | -2.631 | training |
| <b>MnLa/MoSe<sub>2</sub></b> | *N <sub>2</sub>   | -1.544 | -1.579 | training |
| <b>MnLa/MoSe<sub>2</sub></b> | *NH <sub>3</sub>  | -2.188 | -2.299 | test     |
| <b>MnLa/MoSe<sub>2</sub></b> | *N <sub>2</sub> H | -0.866 | -0.977 | test     |
| <b>MnMo/MoSe<sub>2</sub></b> | *NH <sub>3</sub>  | -2.334 | -2.265 | training |
| <b>MnMo/MoSe<sub>2</sub></b> | *N <sub>2</sub>   | -1.654 | -1.538 | training |
| <b>MnMo/MoSe<sub>2</sub></b> | *NH <sub>2</sub>  | -2.557 | -2.555 | training |
| <b>MnMo/MoSe<sub>2</sub></b> | *N <sub>2</sub> H | -0.982 | -0.934 | training |
| <b>MnNb/MoSe<sub>2</sub></b> | *NH <sub>3</sub>  | -2.196 | -2.271 | training |
| <b>MnNb/MoSe<sub>2</sub></b> | *N <sub>2</sub> H | -0.779 | -0.929 | training |
| <b>MnNb/MoSe<sub>2</sub></b> | *N <sub>2</sub>   | -1.416 | -1.533 | test     |
| <b>MnNi/MoSe<sub>2</sub></b> | *NH <sub>2</sub>  | -2.657 | -2.612 | training |
| <b>MnNi/MoSe<sub>2</sub></b> | *N <sub>2</sub>   | -1.521 | -1.502 | training |
| <b>MnNi/MoSe<sub>2</sub></b> | *NH <sub>3</sub>  | -2.461 | -2.293 | training |
| <b>MnNi/MoSe<sub>2</sub></b> | *N <sub>2</sub> H | -0.944 | -0.898 | test     |
| <b>MnOs/MoSe<sub>2</sub></b> | *NH <sub>2</sub>  | -2.594 | -2.689 | training |
| <b>MnOs/MoSe<sub>2</sub></b> | *N <sub>2</sub> H | -1.084 | -0.987 | training |
| <b>MnOs/MoSe<sub>2</sub></b> | *NH <sub>3</sub>  | -2.416 | -2.374 | training |
| <b>MnOs/MoSe<sub>2</sub></b> | *N <sub>2</sub>   | -1.688 | -1.592 | training |
| <b>MnPd/MoSe<sub>2</sub></b> | *NH <sub>3</sub>  | -2.475 | -2.420 | training |
| <b>MnPd/MoSe<sub>2</sub></b> | *N <sub>2</sub>   | -1.578 | -1.624 | training |
| <b>MnPd/MoSe<sub>2</sub></b> | *N <sub>2</sub> H | -1.026 | -1.020 | training |
| <b>MnPd/MoSe<sub>2</sub></b> | *NH <sub>2</sub>  | -2.713 | -2.746 | test     |
| <b>MnPt/MoSe<sub>2</sub></b> | *NH <sub>3</sub>  | -2.397 | -2.367 | training |
| <b>MnPt/MoSe<sub>2</sub></b> | *N <sub>2</sub>   | -1.549 | -1.579 | training |
| <b>MnPt/MoSe<sub>2</sub></b> | *NH <sub>2</sub>  | -2.666 | -2.692 | training |

|                              |                        |               |               |                 |
|------------------------------|------------------------|---------------|---------------|-----------------|
| <b>MnPt/MoSe<sub>2</sub></b> | <b>*N<sub>2</sub>H</b> | <b>-1.001</b> | <b>-0.975</b> | <b>training</b> |
| <b>MnRe/MoSe<sub>2</sub></b> | <b>*NH<sub>3</sub></b> | <b>-2.247</b> | <b>-2.274</b> | <b>training</b> |
| <b>MnRe/MoSe<sub>2</sub></b> | <b>*N<sub>2</sub>H</b> | <b>-0.819</b> | <b>-0.936</b> | <b>training</b> |
| <b>MnRe/MoSe<sub>2</sub></b> | <b>*N<sub>2</sub></b>  | <b>-1.519</b> | <b>-1.540</b> | <b>test</b>     |
| <b>MnRh/MoSe<sub>2</sub></b> | <b>*NH<sub>2</sub></b> | <b>-2.631</b> | <b>-2.659</b> | <b>training</b> |
| <b>MnRh/MoSe<sub>2</sub></b> | <b>*N<sub>2</sub></b>  | <b>-1.539</b> | <b>-1.566</b> | <b>training</b> |
| <b>MnRh/MoSe<sub>2</sub></b> | <b>*N<sub>2</sub>H</b> | <b>-1.011</b> | <b>-0.961</b> | <b>training</b> |
| <b>MnRh/MoSe<sub>2</sub></b> | <b>*NH<sub>3</sub></b> | <b>-2.392</b> | <b>-2.333</b> | <b>training</b> |
| <b>MnRu/MoSe<sub>2</sub></b> | <b>*N<sub>2</sub></b>  | <b>-1.596</b> | <b>-1.585</b> | <b>training</b> |
| <b>MnRu/MoSe<sub>2</sub></b> | <b>*NH<sub>2</sub></b> | <b>-2.580</b> | <b>-2.675</b> | <b>training</b> |
| <b>MnRu/MoSe<sub>2</sub></b> | <b>*N<sub>2</sub>H</b> | <b>-0.962</b> | <b>-0.980</b> | <b>training</b> |
| <b>MnRu/MoSe<sub>2</sub></b> | <b>*NH<sub>3</sub></b> | <b>-2.353</b> | <b>-2.349</b> | <b>test</b>     |
| <b>MnTa/MoSe<sub>2</sub></b> | <b>*NH<sub>3</sub></b> | <b>-2.310</b> | <b>-2.316</b> | <b>training</b> |
| <b>MnTa/MoSe<sub>2</sub></b> | <b>*N<sub>2</sub>H</b> | <b>-0.917</b> | <b>-0.960</b> | <b>training</b> |
| <b>MnTa/MoSe<sub>2</sub></b> | <b>*NH<sub>2</sub></b> | <b>-2.614</b> | <b>-2.648</b> | <b>training</b> |
| <b>MnTa/MoSe<sub>2</sub></b> | <b>*N<sub>2</sub></b>  | <b>-1.579</b> | <b>-1.564</b> | <b>training</b> |
| <b>MnTc/MoSe<sub>2</sub></b> | <b>*N<sub>2</sub>H</b> | <b>-1.034</b> | <b>-0.957</b> | <b>training</b> |
| <b>MnTc/MoSe<sub>2</sub></b> | <b>*N<sub>2</sub></b>  | <b>-1.577</b> | <b>-1.561</b> | <b>training</b> |
| <b>MnTc/MoSe<sub>2</sub></b> | <b>*NH<sub>3</sub></b> | <b>-2.345</b> | <b>-2.299</b> | <b>training</b> |
| <b>MnTc/MoSe<sub>2</sub></b> | <b>*NH<sub>2</sub></b> | <b>-2.573</b> | <b>-2.625</b> | <b>training</b> |
| <b>MnTi/MoSe<sub>2</sub></b> | <b>*N<sub>2</sub>H</b> | <b>-0.811</b> | <b>-0.854</b> | <b>training</b> |
| <b>MnTi/MoSe<sub>2</sub></b> | <b>*NH<sub>2</sub></b> | <b>-2.455</b> | <b>-2.539</b> | <b>training</b> |
| <b>MnTi/MoSe<sub>2</sub></b> | <b>*N<sub>2</sub></b>  | <b>-1.464</b> | <b>-1.458</b> | <b>training</b> |
| <b>MnV/MoSe<sub>2</sub></b>  | <b>*NH<sub>2</sub></b> | <b>-2.515</b> | <b>-2.616</b> | <b>training</b> |
| <b>MnV/MoSe<sub>2</sub></b>  | <b>*N<sub>2</sub>H</b> | <b>-1.031</b> | <b>-0.949</b> | <b>training</b> |
| <b>MnV/MoSe<sub>2</sub></b>  | <b>*NH<sub>3</sub></b> | <b>-2.362</b> | <b>-2.266</b> | <b>test</b>     |
| <b>MnV/MoSe<sub>2</sub></b>  | <b>*N<sub>2</sub></b>  | <b>-1.552</b> | <b>-1.553</b> | <b>test</b>     |
| <b>MnW/MoSe<sub>2</sub></b>  | <b>*N<sub>2</sub></b>  | <b>-1.584</b> | <b>-1.558</b> | <b>training</b> |
| <b>MnW/MoSe<sub>2</sub></b>  | <b>*NH<sub>2</sub></b> | <b>-2.505</b> | <b>-2.576</b> | <b>training</b> |
| <b>MnW/MoSe<sub>2</sub></b>  | <b>*NH<sub>3</sub></b> | <b>-2.210</b> | <b>-2.287</b> | <b>training</b> |
| <b>MnW/MoSe<sub>2</sub></b>  | <b>*N<sub>2</sub>H</b> | <b>-0.953</b> | <b>-0.954</b> | <b>training</b> |
| <b>MnY/MoSe<sub>2</sub></b>  | <b>*NH<sub>2</sub></b> | <b>-2.471</b> | <b>-2.631</b> | <b>training</b> |
| <b>MnY/MoSe<sub>2</sub></b>  | <b>*NH<sub>3</sub></b> | <b>-2.285</b> | <b>-2.299</b> | <b>training</b> |
| <b>MnY/MoSe<sub>2</sub></b>  | <b>*N<sub>2</sub>H</b> | <b>-0.972</b> | <b>-0.986</b> | <b>training</b> |
| <b>MnY/MoSe<sub>2</sub></b>  | <b>*N<sub>2</sub></b>  | <b>-1.647</b> | <b>-1.588</b> | <b>test</b>     |
| <b>MnZn/MoSe<sub>2</sub></b> | <b>*NH<sub>3</sub></b> | <b>-2.392</b> | <b>-2.349</b> | <b>training</b> |
| <b>MnZn/MoSe<sub>2</sub></b> | <b>*N<sub>2</sub></b>  | <b>-1.498</b> | <b>-1.523</b> | <b>training</b> |
| <b>MnZn/MoSe<sub>2</sub></b> | <b>*NH<sub>2</sub></b> | <b>-2.601</b> | <b>-2.654</b> | <b>training</b> |
| <b>MnZr/MoSe<sub>2</sub></b> | <b>*NH<sub>2</sub></b> | <b>-2.567</b> | <b>-2.637</b> | <b>training</b> |
| <b>MnZr/MoSe<sub>2</sub></b> | <b>*N<sub>2</sub></b>  | <b>-1.640</b> | <b>-1.590</b> | <b>training</b> |
| <b>MnZr/MoSe<sub>2</sub></b> | <b>*NH<sub>3</sub></b> | <b>-2.351</b> | <b>-2.305</b> | <b>training</b> |
| <b>MnZr/MoSe<sub>2</sub></b> | <b>*N<sub>2</sub>H</b> | <b>-1.030</b> | <b>-0.986</b> | <b>training</b> |
| <b>MoFe/MoSe<sub>2</sub></b> | <b>*NH<sub>3</sub></b> | <b>-2.466</b> | <b>-2.480</b> | <b>test</b>     |
| <b>MoMn/MoSe<sub>2</sub></b> | <b>*N<sub>2</sub></b>  | <b>-1.448</b> | <b>-1.600</b> | <b>training</b> |
| <b>MoMn/MoSe<sub>2</sub></b> | <b>*N<sub>2</sub>H</b> | <b>-0.965</b> | <b>-1.159</b> | <b>test</b>     |
| <b>MoTi/MoSe<sub>2</sub></b> | <b>*NH<sub>3</sub></b> | <b>-1.498</b> | <b>-2.241</b> | <b>test</b>     |

|                              |                   |        |        |          |
|------------------------------|-------------------|--------|--------|----------|
| <b>MoV/MoSe<sub>2</sub></b>  | *N <sub>2</sub>   | -1.543 | -1.661 | test     |
| <b>MoV/MoSe<sub>2</sub></b>  | *N <sub>2</sub> H | -1.074 | -1.220 | test     |
| <b>NbMn/MoSe<sub>2</sub></b> | *NH <sub>3</sub>  | -2.191 | -2.243 | training |
| <b>NbMn/MoSe<sub>2</sub></b> | *N <sub>2</sub>   | -1.096 | -1.137 | training |
| <b>NbMn/MoSe<sub>2</sub></b> | *N <sub>2</sub> H | -0.668 | -0.642 | training |
| <b>NbTi/MoSe<sub>2</sub></b> | *NH <sub>2</sub>  | -3.021 | -2.836 | training |
| <b>NbTi/MoSe<sub>2</sub></b> | *N <sub>2</sub> H | -0.565 | -0.580 | training |
| <b>NbTi/MoSe<sub>2</sub></b> | *N <sub>2</sub>   | -1.101 | -1.076 | training |
| <b>NbTi/MoSe<sub>2</sub></b> | *NH <sub>3</sub>  | -2.264 | -2.199 | test     |
| <b>NbV/MoSe<sub>2</sub></b>  | *N <sub>2</sub> H | -0.720 | -0.653 | training |
| <b>NbV/MoSe<sub>2</sub></b>  | *N <sub>2</sub>   | -1.152 | -1.148 | training |
| <b>NbV/MoSe<sub>2</sub></b>  | *NH <sub>3</sub>  | -2.141 | -2.230 | training |
| <b>OsFe/MoSe<sub>2</sub></b> | *NH <sub>2</sub>  | -2.884 | -2.821 | training |
| <b>OsFe/MoSe<sub>2</sub></b> | *N <sub>2</sub>   | -2.038 | -1.865 | training |
| <b>OsSc/MoSe<sub>2</sub></b> | *NH <sub>3</sub>  | -3.206 | -3.245 | training |
| <b>OsSc/MoSe<sub>2</sub></b> | *NH <sub>2</sub>  | -3.602 | -3.292 | test     |
| <b>OsTi/MoSe<sub>2</sub></b> | *N <sub>2</sub>   | -1.638 | -1.639 | training |
| <b>OsV/MoSe<sub>2</sub></b>  | *N <sub>2</sub>   | -1.809 | -1.735 | training |
| <b>OsV/MoSe<sub>2</sub></b>  | *NH <sub>3</sub>  | -2.513 | -2.630 | training |
| <b>OsV/MoSe<sub>2</sub></b>  | *N <sub>2</sub> H | -1.225 | -1.233 | training |
| <b>ReFe/MoSe<sub>2</sub></b> | *N <sub>2</sub> H | -1.589 | -1.538 | training |
| <b>ReFe/MoSe<sub>2</sub></b> | *NH <sub>2</sub>  | -3.448 | -3.052 | test     |
| <b>ReFe/MoSe<sub>2</sub></b> | *NH <sub>3</sub>  | -2.750 | -2.737 | test     |
| <b>ReSc/MoSe<sub>2</sub></b> | *NH <sub>3</sub>  | -3.568 | -3.631 | training |
| <b>ReSc/MoSe<sub>2</sub></b> | *N <sub>2</sub>   | -2.711 | -2.674 | training |
| <b>ReSc/MoSe<sub>2</sub></b> | *NH <sub>2</sub>  | -4.289 | -3.985 | training |
| <b>ReSc/MoSe<sub>2</sub></b> | *N <sub>2</sub> H | -2.187 | -2.254 | training |
| <b>ReTi/MoSe<sub>2</sub></b> | *NH <sub>3</sub>  | -2.112 | -2.276 | training |
| <b>ReV/MoSe<sub>2</sub></b>  | *N <sub>2</sub> H | -1.449 | -1.451 | training |
| <b>ReV/MoSe<sub>2</sub></b>  | *NH <sub>3</sub>  | -2.701 | -2.619 | training |
| <b>ReV/MoSe<sub>2</sub></b>  | *N <sub>2</sub>   | -1.895 | -1.872 | training |
| <b>RhCo/MoSe<sub>2</sub></b> | *NH <sub>3</sub>  | -1.856 | -1.832 | training |
| <b>RhCo/MoSe<sub>2</sub></b> | *N <sub>2</sub>   | -0.947 | -0.932 | training |
| <b>RhFe/MoSe<sub>2</sub></b> | *N <sub>2</sub>   | -0.966 | -0.987 | training |
| <b>RhMn/MoSe<sub>2</sub></b> | *NH <sub>3</sub>  | -1.693 | -1.716 | training |
| <b>RhMn/MoSe<sub>2</sub></b> | *N <sub>2</sub>   | -0.722 | -0.837 | training |
| <b>RuFe/MoSe<sub>2</sub></b> | *N <sub>2</sub> H | -0.797 | -0.894 | training |
| <b>RuFe/MoSe<sub>2</sub></b> | *N <sub>2</sub>   | -1.535 | -1.541 | test     |
| <b>RuMn/MoSe<sub>2</sub></b> | *NH <sub>3</sub>  | -2.081 | -2.030 | training |
| <b>RuMn/MoSe<sub>2</sub></b> | *NH <sub>2</sub>  | -2.013 | -2.031 | training |
| <b>ScAg/MoSe<sub>2</sub></b> | *NH <sub>3</sub>  | -2.549 | -2.437 | training |
| <b>ScAg/MoSe<sub>2</sub></b> | *N <sub>2</sub>   | -0.874 | -0.772 | training |
| <b>ScAg/MoSe<sub>2</sub></b> | *N <sub>2</sub> H | -0.314 | -0.408 | training |
| <b>ScCd/MoSe<sub>2</sub></b> | *NH <sub>2</sub>  | -2.895 | -2.933 | training |
| <b>ScCd/MoSe<sub>2</sub></b> | *N <sub>2</sub> H | 0.156  | -0.266 | test     |
| <b>ScCu/MoSe<sub>2</sub></b> | *N <sub>2</sub>   | -0.340 | -0.509 | training |

|                              |                   |        |        |          |
|------------------------------|-------------------|--------|--------|----------|
| <b>ScCu/MoSe<sub>2</sub></b> | *NH <sub>2</sub>  | -2.877 | -2.833 | training |
| <b>ScZn/MoSe<sub>2</sub></b> | *NH <sub>2</sub>  | -2.931 | -2.926 | training |
| <b>ScZn/MoSe<sub>2</sub></b> | *N <sub>2</sub> H | 0.250  | -0.259 | test     |
| <b>TaFe/MoSe<sub>2</sub></b> | *N <sub>2</sub> H | -1.235 | -1.135 | training |
| <b>TaSc/MoSe<sub>2</sub></b> | *N <sub>2</sub>   | -2.199 | -2.095 | training |
| <b>TaTi/MoSe<sub>2</sub></b> | *N <sub>2</sub> H | -0.820 | -0.945 | training |
| <b>TaTi/MoSe<sub>2</sub></b> | *NH <sub>2</sub>  | -2.952 | -2.766 | test     |
| <b>TaV/MoSe<sub>2</sub></b>  | *N <sub>2</sub> H | -1.172 | -1.069 | training |
| <b>TaV/MoSe<sub>2</sub></b>  | *NH <sub>3</sub>  | -2.458 | -2.421 | training |
| <b>TcFe/MoSe<sub>2</sub></b> | *NH <sub>2</sub>  | -2.834 | -2.733 | training |
| <b>TcFe/MoSe<sub>2</sub></b> | *N <sub>2</sub>   | -1.648 | -1.593 | training |
| <b>TcFe/MoSe<sub>2</sub></b> | *NH <sub>3</sub>  | -2.430 | -2.390 | training |
| <b>TcMn/MoSe<sub>2</sub></b> | *N <sub>2</sub>   | -1.492 | -1.527 | training |
| <b>TcSc/MoSe<sub>2</sub></b> | *NH <sub>2</sub>  | -2.555 | -2.657 | training |
| <b>TiAg/MoSe<sub>2</sub></b> | *N <sub>2</sub> H | -0.373 | -0.448 | training |
| <b>TiAg/MoSe<sub>2</sub></b> | *N <sub>2</sub>   | -1.040 | -0.942 | training |
| <b>TiAg/MoSe<sub>2</sub></b> | *NH <sub>3</sub>  | -2.228 | -2.297 | training |
| <b>TiAg/MoSe<sub>2</sub></b> | *NH <sub>2</sub>  | -3.040 | -2.931 | test     |
| <b>TiCr/MoSe<sub>2</sub></b> | *NH <sub>2</sub>  | -2.953 | -2.849 | training |
| <b>TiCr/MoSe<sub>2</sub></b> | *N <sub>2</sub> H | -0.494 | -0.405 | training |
| <b>TiCr/MoSe<sub>2</sub></b> | *NH <sub>3</sub>  | -2.122 | -2.191 | training |
| <b>TiCr/MoSe<sub>2</sub></b> | *N <sub>2</sub>   | -1.037 | -0.898 | training |
| <b>TiCu/MoSe<sub>2</sub></b> | *N <sub>2</sub>   | -0.883 | -0.866 | training |
| <b>TiCu/MoSe<sub>2</sub></b> | *NH <sub>2</sub>  | -2.999 | -2.847 | training |
| <b>TiCu/MoSe<sub>2</sub></b> | *NH <sub>3</sub>  | -2.191 | -2.220 | training |
| <b>TiCu/MoSe<sub>2</sub></b> | *N <sub>2</sub> H | -0.252 | -0.349 | training |
| <b>TiHg/MoSe<sub>2</sub></b> | *N <sub>2</sub> H | -0.332 | -0.437 | training |
| <b>TiHg/MoSe<sub>2</sub></b> | *NH <sub>3</sub>  | -2.292 | -2.305 | training |
| <b>TiHg/MoSe<sub>2</sub></b> | *NH <sub>2</sub>  | -3.028 | -2.939 | training |
| <b>TiHg/MoSe<sub>2</sub></b> | *N <sub>2</sub>   | -0.988 | -0.930 | test     |
| <b>TiIr/MoSe<sub>2</sub></b> | *N <sub>2</sub> H | -0.277 | -0.423 | training |
| <b>TiIr/MoSe<sub>2</sub></b> | *NH <sub>2</sub>  | -2.917 | -2.917 | test     |
| <b>TiMn/MoSe<sub>2</sub></b> | *NH <sub>3</sub>  | -2.190 | -2.196 | test     |
| <b>TiMo/MoSe<sub>2</sub></b> | *N <sub>2</sub>   | -0.397 | -0.648 | training |
| <b>TiMo/MoSe<sub>2</sub></b> | *NH <sub>2</sub>  | -2.376 | -2.535 | training |
| <b>TiNi/MoSe<sub>2</sub></b> | *NH <sub>3</sub>  | -2.133 | -2.213 | training |
| <b>TiNi/MoSe<sub>2</sub></b> | *N <sub>2</sub> H | -0.230 | -0.349 | training |
| <b>TiNi/MoSe<sub>2</sub></b> | *NH <sub>2</sub>  | -2.973 | -2.840 | test     |
| <b>TiNi/MoSe<sub>2</sub></b> | *N <sub>2</sub>   | -0.822 | -0.843 | test     |
| <b>TiOs/MoSe<sub>2</sub></b> | *NH <sub>2</sub>  | -2.901 | -2.909 | training |
| <b>TiOs/MoSe<sub>2</sub></b> | *N <sub>2</sub>   | -0.996 | -0.924 | training |
| <b>TiOs/MoSe<sub>2</sub></b> | *N <sub>2</sub> H | -0.483 | -0.431 | test     |
| <b>TiPt/MoSe<sub>2</sub></b> | *NH <sub>2</sub>  | -2.935 | -2.912 | training |
| <b>TiPt/MoSe<sub>2</sub></b> | *N <sub>2</sub> H | -0.392 | -0.418 | training |
| <b>TiPt/MoSe<sub>2</sub></b> | *N <sub>2</sub>   | -0.935 | -0.912 | training |
| <b>TiRe/MoSe<sub>2</sub></b> | *N <sub>2</sub> H | -0.313 | -0.332 | training |

|                   |                   |        |        |          |
|-------------------|-------------------|--------|--------|----------|
| <b>TiRe/MoSe2</b> | *N <sub>2</sub>   | -0.924 | -0.825 | training |
| <b>TiRe/MoSe2</b> | *NH <sub>3</sub>  | -2.122 | -2.121 | training |
| <b>TiRh/MoSe2</b> | *NH <sub>2</sub>  | -2.991 | -2.879 | training |
| <b>TiRh/MoSe2</b> | *NH <sub>3</sub>  | -2.146 | -2.245 | training |
| <b>TiRh/MoSe2</b> | *N <sub>2</sub>   | -0.740 | -0.899 | training |
| <b>TiRh/MoSe2</b> | *N <sub>2</sub> H | -0.193 | -0.405 | test     |
| <b>TiRu/MoSe2</b> | *NH <sub>2</sub>  | -2.960 | -2.895 | training |
| <b>TiRu/MoSe2</b> | *N <sub>2</sub>   | -0.984 | -0.917 | training |
| <b>TiRu/MoSe2</b> | *NH <sub>3</sub>  | -2.126 | -2.261 | test     |
| <b>TiTc/MoSe2</b> | *NH <sub>2</sub>  | -2.994 | -2.852 | training |
| <b>TiTc/MoSe2</b> | *N <sub>2</sub> H | -0.350 | -0.408 | training |
| <b>TiTc/MoSe2</b> | *NH <sub>3</sub>  | -2.171 | -2.218 | training |
| <b>TiV/MoSe2</b>  | *NH <sub>2</sub>  | -2.984 | -2.848 | training |
| <b>TiV/MoSe2</b>  | *NH <sub>3</sub>  | -2.054 | -2.190 | training |
| <b>TiV/MoSe2</b>  | *N <sub>2</sub> H | -0.461 | -0.404 | training |
| <b>TiZn/MoSe2</b> | *N <sub>2</sub> H | -0.446 | -0.435 | training |
| <b>TiZn/MoSe2</b> | *NH <sub>3</sub>  | -2.313 | -2.303 | training |
| <b>TiZn/MoSe2</b> | *N <sub>2</sub>   | -1.112 | -0.968 | training |
| <b>TiZr/MoSe2</b> | *N <sub>2</sub>   | -0.941 | -0.918 | training |
| <b>TiZr/MoSe2</b> | *N <sub>2</sub> H | -0.409 | -0.425 | training |
| <b>TiZr/MoSe2</b> | *NH <sub>3</sub>  | -2.058 | -2.229 | test     |
| <b>VAg/MoSe2</b>  | *N <sub>2</sub>   | -1.531 | -1.507 | training |
| <b>VAg/MoSe2</b>  | *N <sub>2</sub> H | -1.035 | -0.992 | training |
| <b>VAg/MoSe2</b>  | *NH <sub>2</sub>  | -3.293 | -3.141 | training |
| <b>VAg/MoSe2</b>  | *NH <sub>3</sub>  | -2.543 | -2.518 | training |
| <b>VCd/MoSe2</b>  | *N <sub>2</sub>   | -1.350 | -1.323 | training |
| <b>VCd/MoSe2</b>  | *NH <sub>2</sub>  | -3.185 | -2.986 | test     |
| <b>VCd/MoSe2</b>  | *NH <sub>3</sub>  | -2.483 | -2.399 | test     |
| <b>VCo/MoSe2</b>  | *NH <sub>3</sub>  | -2.396 | -2.386 | training |
| <b>VCo/MoSe2</b>  | *N <sub>2</sub> H | -0.816 | -0.838 | training |
| <b>VCo/MoSe2</b>  | *N <sub>2</sub>   | -1.330 | -1.353 | training |
| <b>VCo/MoSe2</b>  | *NH <sub>2</sub>  | -3.054 | -2.995 | test     |
| <b>VCu/MoSe2</b>  | *N <sub>2</sub>   | -1.115 | -1.231 | training |
| <b>VCu/MoSe2</b>  | *N <sub>2</sub> H | -0.717 | -0.741 | training |
| <b>VCu/MoSe2</b>  | *NH <sub>2</sub>  | -3.022 | -2.905 | training |
| <b>VCu/MoSe2</b>  | *NH <sub>3</sub>  | -2.248 | -2.325 | training |
| <b>VHf/MoSe2</b>  | *N <sub>2</sub> H | -0.903 | -0.916 | training |
| <b>VHf/MoSe2</b>  | *N <sub>2</sub>   | -1.430 | -1.431 | test     |
| <b>VHf/MoSe2</b>  | *NH <sub>3</sub>  | -2.381 | -2.399 | test     |
| <b>VHf/MoSe2</b>  | *NH <sub>2</sub>  | -3.163 | -3.026 | test     |
| <b>VHg/MoSe2</b>  | *NH <sub>3</sub>  | -2.449 | -2.519 | training |
| <b>VHg/MoSe2</b>  | *NH <sub>2</sub>  | -3.198 | -3.142 | training |
| <b>VHg/MoSe2</b>  | *N <sub>2</sub> H | -0.944 | -0.973 | test     |
| <b>VHg/MoSe2</b>  | *N <sub>2</sub>   | -1.373 | -1.488 | test     |
| <b>VIr/MoSe2</b>  | *NH <sub>3</sub>  | -2.403 | -2.454 | training |
| <b>VIr/MoSe2</b>  | *NH <sub>2</sub>  | -3.074 | -3.077 | training |

|                  |                        |               |               |                 |
|------------------|------------------------|---------------|---------------|-----------------|
| <b>VIr/MoSe2</b> | <b>*N<sub>2</sub>H</b> | <b>-0.848</b> | <b>-0.917</b> | <b>test</b>     |
| <b>VLa/MoSe2</b> | <b>*NH<sub>3</sub></b> | <b>-2.278</b> | <b>-2.413</b> | <b>training</b> |
| <b>VLa/MoSe2</b> | <b>*N<sub>2</sub>H</b> | <b>-0.915</b> | <b>-0.939</b> | <b>training</b> |
| <b>VLa/MoSe2</b> | <b>*NH<sub>2</sub></b> | <b>-3.204</b> | <b>-3.041</b> | <b>training</b> |
| <b>VLa/MoSe2</b> | <b>*N<sub>2</sub></b>  | <b>-1.460</b> | <b>-1.454</b> | <b>training</b> |
| <b>VMn/MoSe2</b> | <b>*N<sub>2</sub></b>  | <b>-1.439</b> | <b>-1.396</b> | <b>training</b> |
| <b>VMn/MoSe2</b> | <b>*NH<sub>3</sub></b> | <b>-2.406</b> | <b>-2.376</b> | <b>training</b> |
| <b>VMn/MoSe2</b> | <b>*N<sub>2</sub>H</b> | <b>-0.935</b> | <b>-0.881</b> | <b>test</b>     |
| <b>VMn/MoSe2</b> | <b>*NH<sub>2</sub></b> | <b>-3.044</b> | <b>-2.991</b> | <b>test</b>     |
| <b>VMo/MoSe2</b> | <b>*NH<sub>3</sub></b> | <b>-2.422</b> | <b>-2.357</b> | <b>training</b> |
| <b>VMo/MoSe2</b> | <b>*N<sub>2</sub>H</b> | <b>-0.916</b> | <b>-0.874</b> | <b>training</b> |
| <b>VMo/MoSe2</b> | <b>*N<sub>2</sub></b>  | <b>-1.424</b> | <b>-1.389</b> | <b>training</b> |
| <b>VMo/MoSe2</b> | <b>*NH<sub>2</sub></b> | <b>-3.149</b> | <b>-2.937</b> | <b>test</b>     |
| <b>VNi/MoSe2</b> | <b>*N<sub>2</sub></b>  | <b>-1.253</b> | <b>-1.342</b> | <b>training</b> |
| <b>VNi/MoSe2</b> | <b>*N<sub>2</sub>H</b> | <b>-0.744</b> | <b>-0.827</b> | <b>training</b> |
| <b>VNi/MoSe2</b> | <b>*NH<sub>3</sub></b> | <b>-2.372</b> | <b>-2.374</b> | <b>training</b> |
| <b>VNi/MoSe2</b> | <b>*NH<sub>2</sub></b> | <b>-3.158</b> | <b>-2.983</b> | <b>test</b>     |
| <b>VOs/MoSe2</b> | <b>*NH<sub>2</sub></b> | <b>-2.999</b> | <b>-3.068</b> | <b>training</b> |
| <b>VOs/MoSe2</b> | <b>*N<sub>2</sub>H</b> | <b>-0.881</b> | <b>-0.924</b> | <b>training</b> |
| <b>VOs/MoSe2</b> | <b>*N<sub>2</sub></b>  | <b>-1.356</b> | <b>-1.439</b> | <b>training</b> |
| <b>VOs/MoSe2</b> | <b>*NH<sub>3</sub></b> | <b>-2.337</b> | <b>-2.457</b> | <b>test</b>     |
| <b>VPd/MoSe2</b> | <b>*N<sub>2</sub>H</b> | <b>-1.035</b> | <b>-0.990</b> | <b>training</b> |
| <b>VPd/MoSe2</b> | <b>*NH<sub>2</sub></b> | <b>-3.255</b> | <b>-3.159</b> | <b>training</b> |
| <b>VPt/MoSe2</b> | <b>*N<sub>2</sub></b>  | <b>-1.347</b> | <b>-1.427</b> | <b>training</b> |
| <b>VPt/MoSe2</b> | <b>*NH<sub>3</sub></b> | <b>-2.421</b> | <b>-2.449</b> | <b>training</b> |
| <b>VPt/MoSe2</b> | <b>*NH<sub>2</sub></b> | <b>-3.138</b> | <b>-3.072</b> | <b>training</b> |
| <b>VPt/MoSe2</b> | <b>*N<sub>2</sub>H</b> | <b>-0.980</b> | <b>-0.912</b> | <b>training</b> |
| <b>VRe/MoSe2</b> | <b>*N<sub>2</sub>H</b> | <b>-0.889</b> | <b>-0.868</b> | <b>training</b> |
| <b>VRe/MoSe2</b> | <b>*N<sub>2</sub></b>  | <b>-1.319</b> | <b>-1.383</b> | <b>training</b> |
| <b>VRe/MoSe2</b> | <b>*NH<sub>3</sub></b> | <b>-2.352</b> | <b>-2.352</b> | <b>training</b> |
| <b>VRe/MoSe2</b> | <b>*NH<sub>2</sub></b> | <b>-3.037</b> | <b>-2.931</b> | <b>test</b>     |
| <b>VRu/MoSe2</b> | <b>*N<sub>2</sub>H</b> | <b>-0.972</b> | <b>-0.917</b> | <b>training</b> |
| <b>VRu/MoSe2</b> | <b>*NH<sub>3</sub></b> | <b>-2.407</b> | <b>-2.438</b> | <b>training</b> |
| <b>VRu/MoSe2</b> | <b>*NH<sub>2</sub></b> | <b>-3.073</b> | <b>-3.054</b> | <b>training</b> |
| <b>VRu/MoSe2</b> | <b>*N<sub>2</sub></b>  | <b>-1.360</b> | <b>-1.432</b> | <b>test</b>     |
| <b>VSc/MoSe2</b> | <b>*N<sub>2</sub></b>  | <b>-1.418</b> | <b>-1.436</b> | <b>training</b> |
| <b>VSc/MoSe2</b> | <b>*NH<sub>3</sub></b> | <b>-2.408</b> | <b>-2.393</b> | <b>test</b>     |
| <b>VTa/MoSe2</b> | <b>*NH<sub>3</sub></b> | <b>-2.399</b> | <b>-2.408</b> | <b>training</b> |
| <b>VTa/MoSe2</b> | <b>*NH<sub>2</sub></b> | <b>-3.149</b> | <b>-3.036</b> | <b>training</b> |
| <b>VTa/MoSe2</b> | <b>*N<sub>2</sub>H</b> | <b>-0.885</b> | <b>-0.906</b> | <b>test</b>     |
| <b>VTa/MoSe2</b> | <b>*N<sub>2</sub></b>  | <b>-1.443</b> | <b>-1.421</b> | <b>test</b>     |
| <b>VTc/MoSe2</b> | <b>*N<sub>2</sub>H</b> | <b>-0.964</b> | <b>-0.897</b> | <b>training</b> |
| <b>VTc/MoSe2</b> | <b>*NH<sub>3</sub></b> | <b>-2.389</b> | <b>-2.391</b> | <b>training</b> |
| <b>VTc/MoSe2</b> | <b>*N<sub>2</sub></b>  | <b>-1.462</b> | <b>-1.412</b> | <b>test</b>     |
| <b>VTc/MoSe2</b> | <b>*NH<sub>2</sub></b> | <b>-3.124</b> | <b>-3.007</b> | <b>test</b>     |
| <b>VTi/MoSe2</b> | <b>*N<sub>2</sub>H</b> | <b>-0.808</b> | <b>-0.805</b> | <b>training</b> |

|                              |                   |        |        |          |
|------------------------------|-------------------|--------|--------|----------|
| <b>VTi/MoSe<sub>2</sub></b>  | *N <sub>2</sub>   | -1.318 | -1.320 | training |
| <b>VTi/MoSe<sub>2</sub></b>  | *NH <sub>2</sub>  | -2.982 | -2.932 | training |
| <b>VTi/MoSe<sub>2</sub></b>  | *NH <sub>3</sub>  | -2.258 | -2.316 | test     |
| <b>VY/MoSe<sub>2</sub></b>   | *N <sub>2</sub> H | -1.002 | -0.948 | training |
| <b>VY/MoSe<sub>2</sub></b>   | *NH <sub>2</sub>  | -3.182 | -3.041 | training |
| <b>VY/MoSe<sub>2</sub></b>   | *N <sub>2</sub>   | -1.495 | -1.463 | training |
| <b>VY/MoSe<sub>2</sub></b>   | *NH <sub>3</sub>  | -2.364 | -2.413 | training |
| <b>VZn/MoSe<sub>2</sub></b>  | *N <sub>2</sub>   | -1.245 | -1.316 | training |
| <b>VZn/MoSe<sub>2</sub></b>  | *NH <sub>3</sub>  | -2.310 | -2.391 | training |
| <b>VZn/MoSe<sub>2</sub></b>  | *NH <sub>2</sub>  | -2.989 | -2.978 | training |
| <b>VZr/MoSe<sub>2</sub></b>  | *NH <sub>2</sub>  | -3.179 | -3.028 | training |
| <b>VZr/MoSe<sub>2</sub></b>  | *NH <sub>3</sub>  | -2.332 | -2.400 | training |
| <b>VZr/MoSe<sub>2</sub></b>  | *N <sub>2</sub> H | -0.996 | -0.935 | training |
| <b>VZr/MoSe<sub>2</sub></b>  | *N <sub>2</sub>   | -1.537 | -1.450 | test     |
| <b>WFe/MoSe<sub>2</sub></b>  | *N <sub>2</sub>   | -1.857 | -1.933 | training |
| <b>WFe/MoSe<sub>2</sub></b>  | *NH <sub>3</sub>  | -2.690 | -2.720 | training |
| <b>WV/MoSe<sub>2</sub></b>   | *N <sub>2</sub>   | -1.895 | -1.854 | training |
| <b>WV/MoSe<sub>2</sub></b>   | *NH <sub>3</sub>  | -2.659 | -2.614 | training |
| <b>WV/MoSe<sub>2</sub></b>   | *N <sub>2</sub> H | -1.307 | -1.427 | training |
| <b>YTi/MoSe<sub>2</sub></b>  | *NH <sub>3</sub>  | -2.526 | -2.340 | training |
| <b>YTi/MoSe<sub>2</sub></b>  | *N <sub>2</sub>   | -0.519 | -0.599 | training |
| <b>ZrMn/MoSe<sub>2</sub></b> | *NH <sub>3</sub>  | -2.185 | -2.283 | training |
| <b>ZrMn/MoSe<sub>2</sub></b> | *N <sub>2</sub> H | -0.532 | -0.646 | training |
| <b>ZrMn/MoSe<sub>2</sub></b> | *N <sub>2</sub>   | -1.177 | -1.011 | training |
| <b>ZrTi/MoSe<sub>2</sub></b> | *N <sub>2</sub>   | -0.838 | -0.935 | training |
| <b>ZrTi/MoSe<sub>2</sub></b> | *N <sub>2</sub> H | -0.236 | -0.569 | test     |
| <b>ZrV/MoSe<sub>2</sub></b>  | *N <sub>2</sub>   | -1.125 | -1.012 | training |
| <b>ZrV/MoSe<sub>2</sub></b>  | *N <sub>2</sub> H | -0.535 | -0.646 | training |
| <b>ZrV/MoSe<sub>2</sub></b>  | *NH <sub>3</sub>  | -2.204 | -2.260 | training |

**Table S2** Catalysts which stand out after two screenings and their adsorption energy of intermediates and free energy of intermediate steps.

| <b>Catalyst</b>              | <b>E(N<sub>2</sub>)<br/>/eV</b> | <b>E(N<sub>2</sub>H)<br/>/eV</b> | <b>E(NH<sub>2</sub>)<br/>/eV</b> | <b>E(NH<sub>3</sub>)<br/>/eV</b> | <b>ΔG(N<sub>2</sub>-<br/>N<sub>2</sub>H) /eV</b> | <b>ΔG(NH<sub>2</sub>-<br/>NH<sub>3</sub>) /eV</b> | <b>ΔG<sub>des</sub>(NH<sub>3</sub>)<br/>/eV</b> |
|------------------------------|---------------------------------|----------------------------------|----------------------------------|----------------------------------|--------------------------------------------------|---------------------------------------------------|-------------------------------------------------|
| <b>CrMn/MoSe<sub>2</sub></b> | -1.112                          | -0.712                           | -2.899                           | -2.308                           | 0.401                                            | 0.591                                             | 1.075                                           |
| <b>CrZr/MoSe<sub>2</sub></b> | -1.122                          | -0.721                           | -2.904                           | -2.313                           | 0.401                                            | 0.591                                             | 1.080                                           |
| <b>CrTc/MoSe<sub>2</sub></b> | -1.122                          | -0.721                           | -2.911                           | -2.324                           | 0.401                                            | 0.587                                             | 1.091                                           |
| <b>CrHf/MoSe<sub>2</sub></b> | -1.117                          | -0.717                           | -2.904                           | -2.313                           | 0.401                                            | 0.591                                             | 1.080                                           |
| <b>CrTa/MoSe<sub>2</sub></b> | -1.124                          | -0.715                           | -2.905                           | -2.323                           | 0.409                                            | 0.582                                             | 1.090                                           |
| <b>CrRe/MoSe<sub>2</sub></b> | -1.052                          | -0.645                           | -2.832                           | -2.245                           | 0.407                                            | 0.587                                             | 1.012                                           |
| <b>CrNi/MoSe<sub>2</sub></b> | -1.090                          | -0.679                           | -2.904                           | -2.317                           | 0.411                                            | 0.587                                             | 1.084                                           |
| <b>CrFe/MoSe<sub>2</sub></b> | -1.715                          | -1.236                           | -2.912                           | -2.446                           | 0.479                                            | 0.465                                             | 0.508                                           |
| <b>TcFe/MoSe<sub>2</sub></b> | -1.648                          | -1.284                           | -2.834                           | -2.430                           | 0.364                                            | 0.404                                             | 0.492                                           |
| <b>OsFe/MoSe<sub>2</sub></b> | -2.038                          | -1.592                           | -2.884                           | -2.603                           | 0.445                                            | 0.281                                             | 0.665                                           |
| <b>TcMn/MoSe<sub>2</sub></b> | -1.492                          | -1.050                           | -2.813                           | -2.356                           | 0.442                                            | 0.457                                             | 0.418                                           |

**Table S3** Comparison of the predicted free energy and the calculated free energy of three catalysts verified by DFT.

| Catalyst                     | E(N <sub>2</sub> ) | E(N <sub>2</sub> H) | E(NH <sub>2</sub> ) | E(NH <sub>3</sub> ) | $\Delta G(\text{N}_2\text{-N}_2\text{H})$ | $\Delta G(\text{NH}_2\text{-NH}_3)$ | $\Delta G_{\text{des}}(\text{NH}_3)$ |
|------------------------------|--------------------|---------------------|---------------------|---------------------|-------------------------------------------|-------------------------------------|--------------------------------------|
| <b>CrNi/MoSe<sub>2</sub></b> | -1.090             | -0.679              | -2.904              | -2.317              | 0.411                                     | 0.587                               | 0.665                                |
| <b>DFT</b>                   | -1.272             | -0.855              | -2.544              | -2.094              | 0.417                                     | 0.450                               | 0.861                                |
| <b>OsFe/MoSe<sub>2</sub></b> | -2.038             | -1.592              | -2.884              | -2.603              | 0.445                                     | 0.281                               | 1.084                                |
| <b>DFT</b>                   | -1.843             | -1.401              | -2.788              | -2.315              | 0.442                                     | 0.472                               | 1.082                                |
| <b>TcMn/MoSe<sub>2</sub></b> | -1.492             | -1.050              | -2.813              | -2.356              | 0.442                                     | 0.457                               | 0.418                                |
| <b>DFT</b>                   | -1.520             | -1.129              | -2.604              | -2.102              | 0.391                                     | 0.502                               | 0.869                                |

## Supplementary References

1. J. P. Perdew, K. Burke and M. Ernzerhof, *Phys. Rev. Lett.*, 1996, **77**, 3865-3868.
2. G. Kresse and J. Furthmüller, *Physical Review B*, 1996, **54**, 11169-11186.
3. G. Kresse and J. Furthmüller, *Comput. Mater. Sci.*, 1996, **6**, 15-50.
4. G. Kresse and D. Joubert, *Physical Review B*, 1999, **59**, 1758-1775.
5. M. Cococcioni and S. de Gironcoli, *Physical Review B*, 2005, **71**, 035105.
6. M. Khan, M. N. Tripathi and A. Tripathi, *Mater. Sci. Semicond. Process.*, 2024, **177**, 108339.
7. M. Khan, M. N. Tripathi and A. Tripathi, *J. Mater. Res.*, 2022, **37**, 3340-3351.
8. E. Skulason, T. Bligaard, S. Gudmundsdottir, F. Studt, J. Rossmeisl, F. Abild-Pedersen, T. Vegge, H. Jonsson and J. K. Nørskov, *Phys. Chem. Chem. Phys.*, 2012, **14**, 1235-1245.
9. J. G. Howalt, T. Bligaard, J. Rossmeisl and T. Vegge, *Phys. Chem. Chem. Phys.*, 2013, **15**, 7785-7795.
10. L. Breiman, *Mach. Learn.*, 1996, **24**, 123-140.
11. F. Pedregosa, G. Varoquaux, A. Gramfort, V. Michel, B. Thirion, O. Grisel, M. Blondel, P. Prettenhofer, R. Weiss, V. Dubourg, J. Vanderplas, A. Passos, D. Cournapeau, M. Brucher, M. Perrot and E. Duchesnay, *J. Mach. Learn. Res.*, 2011, **12**, 2825-2830.
12. A. C. Lorena, L. F. O. Jacintho, M. F. Siqueira, R. D. Giovanni, L. G. Lohmann, A. C. P. L. F. de Carvalho and M. Yamamoto, *Expert Syst. Appl.*, 2011, **38**, 5268-5275.
13. J. H. Friedman, *The Annals of Statistics*, 2001, **29**, 1189-1232.
